# Plasmid co-infection: linking biological mechanisms to ecological and evolutionary dynamics

Claudia Igler<sup>1</sup>, Jana S. Huisman<sup>1,2</sup>, Berit Siedentop<sup>1</sup>,  
Sebastian Bonhoeffer<sup>1</sup>, Sonja Lehtinen<sup>1\*</sup>

<sup>1</sup> Institute of Integrative Biology, Department of Environmental Systems Science, ETH Zürich, Zurich, Switzerland

<sup>2</sup> Swiss Institute of Bioinformatics, Lausanne, Switzerland

\* Corresponding author; Email: [sonja.lehtinen@env.ethz.ch](mailto:sonja.lehtinen@env.ethz.ch)

## Abstract

As infectious agents of bacteria and vehicles of horizontal gene transfer, plasmids play a key role in bacterial ecology and evolution. Plasmid dynamics are shaped not only by plasmid-host interactions, but also by ecological interactions between plasmid variants. These interactions are complex: plasmids can co-infect the same host cell and the consequences for the co-resident plasmid can be either beneficial or detrimental. Many of the biological processes that govern plasmid co-infection—from systems to exclude infection by other plasmids to interactions in the regulation of plasmid copy number per cell—are well characterised at a mechanistic level. Modelling plays a central role in translating such mechanistic insights into predictions about plasmid dynamics, and in turn, the impact of these dynamics on bacterial evolution. Theoretical work in evolutionary epidemiology has shown that formulating models of co-infection is not trivial, as some modelling choices can introduce unintended ecological assumptions. Here, we review how the biological processes that govern co-infection can be represented in a mathematical model, discuss potential modelling pitfalls, and analyse this model to provide general insights into how co-infection impacts eco-evolutionary outcomes. In particular, we demonstrate how beneficial and detrimental effects of co-infection give rise to frequency-dependent selection.

## 1 Introduction

1 Plasmids are mobile genetic elements of bacteria that play a fundamental role in a variety of  
2 areas, including bacterial evolution [1, 2], clinical infections [3, 4] and biotechnology [5, 6].  
3 Naturally occurring plasmids exhibit considerable diversity, both in the genes necessary for  
4 plasmid replication and spread ('plasmid backbone') [7–10] - and 'cargo' genes, which do not  
5 directly impact the plasmid but affect the fitness of the host cell. Such cargo genes can encode  
6 traits including antibiotic resistance [11, 12], heavy metal tolerance [13], virulence [14], and  
7 toxins for inter-strain competition [15]).

8 The ecological interactions which shape this diversity are complex: plasmids compete for a  
9 limited resource – host cells to infect – but host cells often carry more than one type of plas-  
10 mid ('co-infection') [16–18]. The interactions between co-resident plasmids play a major role  
11 in shaping plasmid ecology and evolution. On the one hand, competitive within-cell interac-  
12 tions exert a strong selective pressure on the plasmid backbone, for example by driving the  
13 diversification of plasmid replication machinery [19] or the development of systems aimed at  
14 hindering co-resident plasmids [8, 10]. Particularly, many plasmids carry systems that prevent  
15 co-infection with closely related plasmids, indicating the importance of reducing intra-cellular  
16 competition [7]. On the other hand, within-host interactions can also be beneficial for one or  
17 both of the co-resident plasmids. This benefit can arise from increased horizontal transmission,  
18 for example through increased conjugation rates from co-infected cells to recipient cells [20];  
19 or from vertical transmission (i.e. plasmid inheritance to daughter cells), for example through  
20 positive epistasis in fitness cost, meaning that the metabolic burden for the host is reduced  
21 [18, 21]. Not all plasmids are conjugative (i.e. can transfer themselves horizontally), but some  
22 non-conjugative plasmids can hitchhike along with the conjugation apparatus of co-infecting  
23 plasmids [22, 23], making them mobilisable, whereas others are non-mobilisable in general.  
24 Overall, within-host interactions crucially shape the fitness landscape plasmids exist in, and

25 thus their population dynamics and diversity.

26 The (known) biological processes shaping plasmid co-infection have been studied in consider-  
27 able mechanistic detail [19, 24–27]. Given the complex interactions between these processes  
28 and the difficulties in scaling experimental systems to many genetic and environmental condi-  
29 tions, mathematical modelling plays a central role in translating mechanistic insights into pre-  
30 dictions about plasmid dynamics and diversity in nature. For example, models of co-infection  
31 have provided insights into the conditions for co-existence of conjugative plasmids [28–31];  
32 the maintenance of non-conjugative plasmids [32, 33]; factors influencing gene mobility be-  
33 tween plasmids [34]; and the evolution of specific traits such as surface exclusion [28] and  
34 toxin-antitoxin systems [35].

35 Existing models have proven useful in understanding specific aspects co-infection, but here  
36 we develop a more general framework relating co-infection processes to eco-evolutionary out-  
37 comes. This approach is particularly important because constructing appropriate models of co-  
38 infection is not trivial: theoretical work on co-infection between disease strains has shown that  
39 seemingly innocuous modelling choices can introduce unintended ecological differences be-  
40 tween strains, with considerable impact on model outcomes [36–38]. In particular, model struc-  
41 tures easily introduce mechanisms which unintentionally promote strain diversity (‘co-existence  
42 for free’) [36]. Models of plasmid conjugation are structurally similar to these epidemiologi-  
43 cal models of infectious disease transmission, making these concerns about implicit modelling  
44 assumptions also relevant for plasmid co-infection.

45 Our aim is to develop a synthesis of how the biological processes governing co-infection in-  
46 fluence the outcomes of plasmid competition. We begin by constructing a general model of  
47 co-infection by abstracting many of the processes involved, which allows for flexibility in im-  
48 plementing the underlying biological mechanisms. These different possibilities of implemen-  
49 tation are discussed in the context of a literature review on the relevant features of plasmid  
50 co-infection. We proceed by giving an intuition of how various co-infection parameters affect  
51 bacterial population diversity and by developing a general relationship between co-infection and  
52 evolutionary outcomes. Finally, we summarize the main findings of our synthesis and give an  
53 outlook on future experimental and theoretical explorations arising from it.

## 54 2 A model of plasmid co-infection

55 We begin by developing a model of the population dynamics of two plasmid variants,  $A$  and  
56  $B$ , (co-)infecting a bacterial population. This model tracks the density of cell populations in  
57 terms of their infection status: no plasmid ( $P_0$ ), plasmid  $A$  ( $P_A$ ), plasmid  $B$  ( $P_B$ ) or co-infected  
58 with both plasmids ( $P_{AB}$ ). We are specifically interested in the effects of vertical and horizontal  
59 transmission of co-infection. Hence, our exploration focuses on conjugative plasmids, but the  
60 same model structure would also be appropriate for a pair of plasmids where one is conjuga-  
61 tive and one mobilisable. The model captures the following fundamental steps in the life-cycle  
62 of conjugative plasmids. Plasmids reside within bacterial cells at a copy number determined  
63 by the plasmid backbone, which can range from 1-10 [39] to up to 200 [40] copies per cell.  
64 (Note that here we do not explicitly model copy number.) Resident plasmids can be transmitted  
65 either vertically via host cell replication, or horizontally via conjugation. Vertical transmission  
66 requires plasmid replication and partitioning within the cell such that both daughter cells inherit  
67 at least one plasmid copy. Conjugation requires expression of transfer genes and close contact  
68 between a recipient and a donor cell, allowing transfer of a plasmid copy. The recipient may  
69 already carry another plasmid, resulting in co-infection. Co-residence of two (or more) plasmid  
70 variants can impact each of these processes and even prevent some from taking place at all.  
71 The detailed biological mechanisms will be discussed in section 3. First, we develop a more  
72 conceptual intuition of these processes through their realisation in a mathematical model (Fig-  
73 ure 1, more details on model structure are given in Supplementary Text 2 and Supplementary  
74 Table S1):

75 **Bacterial population size** We model changes in the host cell density in two components: i)  
76 a density-dependent *replication* rate  $\rho_i(1 - \frac{T}{K})$ , with  $\rho_i$  representing the maximum replication  
77 rate,  $i$  the cell type (0,  $A$ ,  $B$  or  $AB$ ),  $T$  the total cell density ( $T = P_0 + P_A + P_B + P_{AB}$ ) and  $K$   
78 the carrying capacity; ii) a density-independent *death* rate  $\gamma_i$ . Plasmid costs and benefits can  
79 be captured in both  $\rho_i$  and  $\gamma_i$ , for each cell type individually.

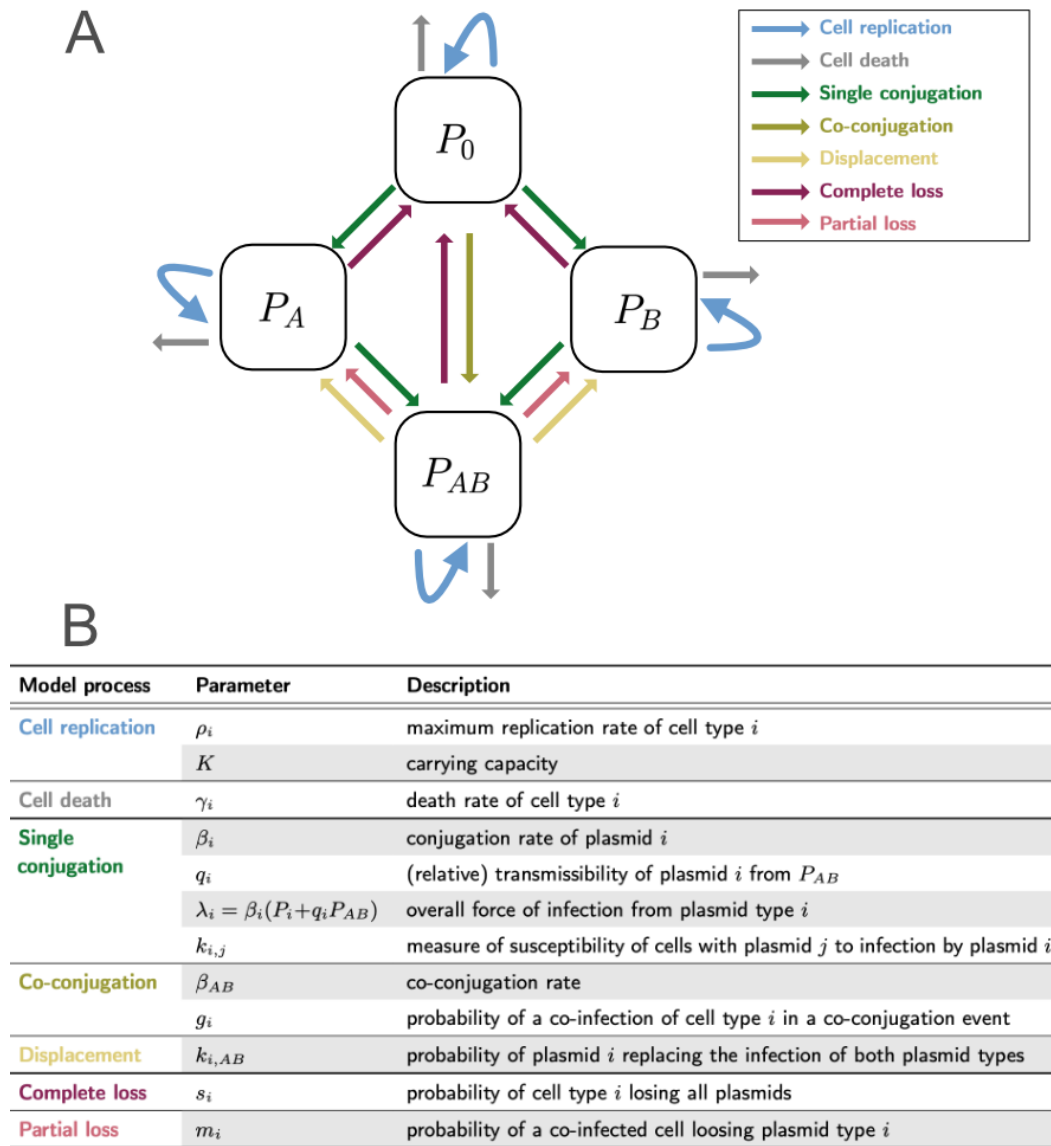

Figure 1: **Visualization of the modelled plasmid co-infection processes and the corresponding parameters.** **A.** Schematic diagram of the co-infection model given by equations 1.  $P_0$  denotes plasmid-free cells,  $P_A$  and  $P_B$  are bacterial cells infected with plasmid variant  $A$  or  $B$ , respectively, and  $P_{AB}$  are cells co-infected with  $A$  and  $B$ . Arrows indicate the transition of cells between states. **B.** Co-infection processes incorporated in the model, listed with their associated parameters and parameter descriptions.

80 **Plasmid conjugation** *Single conjugation*: Plasmids conjugate in a manner dependent on host  
 81 cell density, at rate  $\beta_i$ , where  $i$  indicates plasmid variant  $A$  or  $B$ . The relative transmissibility of  
 82 plasmid  $i$  from co-infected cells ( $P_{AB}$ ), is given by  $q_i$ . Thus, the overall force of infection from  
 83 plasmid variant  $i$  is  $\lambda_i = \beta_i(P_i + q_i P_{AB})$ .

84 If the recipient cell is already (singly) infected with plasmid variant  $j$ , further infection with  
 85 plasmid variant  $i$  is possible, and leads to co-infection. The susceptibility of cells with (only)  
 86 plasmid  $j$  to infection by plasmid  $i$ , relative to cells with no plasmid, is given by  $k_{i,j}$ .

87 If the recipient is already co-infected, further infection with either variant can theoretically lead to  
 88 *displacement* of the co-resident variant, and a return to a singly infected state (known as ‘knock-  
 89 out’ in the epidemiological modelling literature [36]). The probability of plasmid  $i$  displacing  
 90 plasmid  $j$  from a co-infected cell upon infection is given by  $k_{i,AB}$ .

91 *Co-conjugation*: If co-infected cells can also transmit both plasmids simultaneously (‘co-transfer’),  
 92 co-conjugation from  $P_{AB}$  occurs at rate  $\beta_{AB}$ . Hence, the overall infectiousness of co-infected

93 cells is given by  $q_A\beta_A + q_B\beta_B + \beta_{AB}$ . If the recipient carries no plasmid ( $P_0$ ), it transitions  
 94 directly to the  $P_{AB}$  state. If the recipient is singly infected, e.g.  $P_A$ , co-conjugation leads to  
 95 co-infection with probability  $g_A$ .

96 **Plasmid segregation loss Complete loss:** Cells can lose (single or double) plasmid carriage  
 97 completely during cell division ( $s_i$ ).

98 *Partial loss:* Co-infected cells can revert to being singly infected if they lose only one plasmid  
 99 variant. This occurs with probability  $m_i$  (with the constraint  $m_A + m_B \leq 1$ ). Note that, de-  
 100 pending on the specific mechanism of plasmid loss in co-infected cells,  $s_i$  and  $m_i$  may not be  
 101 independent, which can be captured by constraining their relationship.

102 These processes are captured by the following equations (with colors corresponding to Fig-  
 103 ure 1):

$$\begin{aligned}
 \frac{dP_0}{dt} &= P_0 \left[ \rho_0 \left(1 - \frac{T}{K}\right) - \gamma_0 - \lambda_A - \lambda_B - \beta_{AB} P_{AB} \right] + \left(1 - \frac{T}{K}\right) [\rho_A s_A P_A + \rho_B s_B P_B + \rho_{AB} s_{AB} P_{AB}] \\
 \frac{dP_A}{dt} &= P_A \left[ \rho_A (1 - s_A) \left(1 - \frac{T}{K}\right) - \gamma_A - k_{B,A} (\lambda_B + g_A \beta_{AB} P_{AB}) \right] + \lambda_A (P_0 + k_{A,AB} P_{AB}) \\
 &\quad + m_B \rho_{AB} (1 - s_{AB}) \left(1 - \frac{T}{K}\right) P_{AB} \\
 \frac{dP_B}{dt} &= P_B \left[ \rho_B (1 - s_B) \left(1 - \frac{T}{K}\right) - \gamma_B - k_{A,B} (\lambda_A + g_B \beta_{AB} P_{AB}) \right] + \lambda_B (P_0 + k_{B,AB} P_{AB}) \\
 &\quad + m_A \rho_{AB} (1 - s_{AB}) \left(1 - \frac{T}{K}\right) P_{AB} \\
 \frac{dP_{AB}}{dt} &= P_{AB} \left[ \rho_{AB} (1 - s_{AB}) (1 - m_A - m_B) \left(1 - \frac{T}{K}\right) + \beta_{AB} (P_0 + g_A k_{B,A} P_A + g_B k_{A,B} P_B) \right. \\
 &\quad \left. - \gamma_{AB} - k_{A,AB} \lambda_A - k_{B,AB} \lambda_B \right] + k_{B,A} \lambda_B P_A + k_{A,B} \lambda_A P_B
 \end{aligned} \tag{1}$$

104

### 105 3 Model parameters - Biological mechanisms

106 Having introduced the basic processes involved in plasmid co-infection, we will briefly portray  
 107 the underlying complexity of biological mechanisms and how these can be incorporated into  
 108 our model structure.

109 **Plasmid replication and partitioning** The most important steps in faithful vertical plasmid  
 110 transmission are plasmid replication and (for some plasmids) partitioning, which positions plas-  
 111 mid copies within the cell to ensure inheritance to both daughter cells. When co-infecting plas-  
 112 mid variants share the same replication and/or partitioning regulation, either variant is more  
 113 likely to be lost during cell division. This leads to an inability of plasmid variants to coexist  
 114 stably in the same cell lineage, which is used to define plasmid incompatibility [19] – although,  
 115 as this definition is based on a phenotype, ‘incompatibility’ can also arise from other within-host  
 116 interactions [41]. The degree of incompatibility is dependent on the specific system and the  
 117 plasmid variant, with identical co-resident plasmids showing segregation loss rates between  
 118 1-15% per replication [42] (Table S2).

119 *Replication systems:* Plasmid replication, and hence plasmid copy number in the cell, is tightly  
 120 regulated to minimize the cost to the host - while still guaranteeing stable vertical transmission.  
 121 Generally, the distribution around the target copy number within each cell is a narrow Gaussian  
 122 [43], but recent evidence showed that the standard deviation can be on the order of the mean  
 123 copy number [44]. Replication control is based on feedback from the plasmid copy number  
 124 in the cell (down-regulation at high copy numbers)[19]. Hence, incompatibility arises from the  
 125 inability of plasmids to differentiate between their own and the co-resident’s copy number and  
 126 correct for deviations from the target number [19]. Two plasmid variants sharing replication  
 127 determinants will establish the same overall copy number as they would individually, but with  
 128 a mixed plasmid pool. Random sampling from this pool for replication leads to heterogeneity  
 129 in the within-host frequencies of the two plasmid variants [19]. In absence of other effects  
 130 (including conjugation), genetic drift will lead to eventual loss of all copies of one plasmid variant  
 131 from the cell lineage (Table S2).

132 *Partitioning systems*: To ensure stable inheritance to both daughter cells, sibling plasmids have  
133 to be separated into the two cell halves after replication. This is especially important for low  
134 copy number plasmids, which are known to use partitioning systems for this purpose. However,  
135 non-random positioning has also been found for high copy number plasmids [45], which is  
136 beneficial if heterogeneity in copy number can indeed be large [44].

137 Partitioning systems generally consist of three (plasmid-encoded) components: a centromere-  
138 like DNA site and two proteins, an NTPase (energy production and movement) and a centromere-  
139 binding protein (plasmid tethering) [46]. The incompatibility mechanism is determined by the  
140 affected component and can lead for example to random partitioning or centromere-binding  
141 protein sequestration [47]. The variation that is found in centromere-like DNA sites alone indi-  
142 cates selection pressure for distinct partitioning systems [47]. Notably, some plasmids harbor  
143 multiple partitioning systems, which can increase their stability compared to either system alone  
144 [48].

145 The influence of partitioning and replication systems on plasmid co-infection differs depending  
146 on their relatedness (Figure S6):

- 147 • Identical replication systems: Complete and partial segregation loss are symmetrical  
148 ( $s_{AB} = s_A = s_B$ ,  $m_A = m_B$ ). Partial segregation loss is more frequent than for com-  
149 patible plasmids (Table S2), especially if partitioning is also incompatible [49].
- 150 • Related replication systems: Partial segregation probabilities can be either symmetric or  
151 favor the plasmid that is less sensitive to the incompatibility determinant. Higher stability  
152 could also be related to a difference in copy number, as higher numbers increase the  
153 chance of being selected as a replication template [19].
- 154 • Compatible replication systems: Incompatibility can still arise via partitioning systems  
155 only. Again, this can lead to symmetric or asymmetric segregation loss for co-resident  
156 plasmids. Interestingly, for low copy number plasmids with partitioning incompatibility,  
157 loss rates can be even higher (4-5fold) than those arising from random partitioning [50].

158 Replication and partitioning further influence susceptibility to co-infection and displacement  
159 ( $k_{i,j}$ ,  $k_{i,AB}$ ). First, a newly co-infecting plasmid variant will have a low copy number compared  
160 to the established variant, thus making it more likely to be lost during the first rounds of cell  
161 replication, if the previously established plasmid is incompatible. Second, if segregation loss  
162 of one of the incompatible plasmid variants is very rapid, co-infection becomes negligible and  
163 need not be modelled at all. Current estimates indicate however, that plasmid loss is slow, with  
164 probabilities of 1-22% per generation (Table S2).

165 Replication and partitioning systems impact a number of other model parameters indirectly,  
166 since they lead to a lower copy number of each plasmid variant in the co-infected cell. This  
167 can decrease the probability of successful conjugation ( $q_i$ ) [51] and plasmid cost ( $\rho_{AB}$ ,  $\gamma_{AB}$ ),  
168 compared to co-infection with compatible plasmids.

169 **Toxin-Antitoxin systems** Toxin-Antitoxin (TA) systems on plasmid are usually seen as ad-  
170 diction modules that select against plasmid-free cells through 'post-segregational killing' [52]:  
171 After plasmid loss, neither toxin nor antitoxin is produced any longer, but the more stable toxin  
172 persists (without antitoxin) in the cell and interferes with essential cellular processes like repli-  
173 cation, translation and cell-wall synthesis [53]. However, toxin inhibition of cell metabolism  
174 seems generally reversible (e.g. the F plasmid toxin inhibits cell division only until completion  
175 of plasmid replication [54]), with cell killing only being observed in over-expression experiments  
176 [55]. This suggests that TA systems not only reduce competition from cells that have lost the  
177 plasmid, but also increase faithful inheritance by slowing cell division.

178 While TA systems have been found to promote plasmid maintenance, they seem to be (up to  
179 a 100-fold) less efficient than partitioning systems [53] (Table S2). Their overall stabilization  
180 effect varies considerably (2.5-100fold) and is dependent on the host strain [56] (Table S2). The  
181 impact of TA systems during co-infection could be greater, as loss of the TA-carrying plasmid  
182 will slow down vertical and horizontal transmission of the non-TA-carrying plasmid [8].

183 The influence of plasmid TA systems can be modeled in various ways (Table 1):

- 184 • If TA systems kill the plasmid-free host, segregation loss leads to cell death instead of  
185 transition to the plasmid-free state. This can be modelled by introducing a  $(1 - x)$  modifier

186 to the complete segregation loss term ( $s_i$ ) in the equation for  $P_0$  (only): a proportion  $x$   
187 of cells that lose the plasmid die. For co-infection with a TA-carrying ( $A$ ) and non-TA-  
188 carrying ( $B$ ) plasmid, partial segregation loss ( $m_A$ ) and displacement ( $k_{B,AB}$ ) can be  
189 similarly modified in the equation for  $P_B$  to capture cell death following the loss of plasmid  
190  $A$ .

- 191 • If TA systems slow down cell division, the increased vertical stability can be modelled  
192 by decreasing complete ( $s_i$ ) and partial segregation loss ( $m_i$ ), at the cost of a lower  
193 replication rate ( $\rho_i$ ). This slower cell division may also increase vertical stability (i.e. de-  
194 crease  $m_i$ ) of a co-resident plasmid. The decreased competitiveness of cells that have  
195 lost the TA-carrying plasmid would be most accurately represented by introducing addi-  
196 tional states to capture the temporary reduction in post-segregational replication rate. To  
197 avoid the introduction of additional states, the effect may be approximated by modelling  
198 the decreased net growth rate through post-segregational death (i.e. as above).

199 **Effect on host cell fitness** The effect of plasmids on the fitness of their host cells can be  
200 negative or positive. Hence, co-infection can impact the vertical transmission of co-resident  
201 plasmids through effects on host cell replication or death ( $\rho_{AB}$ ,  $\gamma_{AB}$ ). Importantly, these effects  
202 may be different than expected from the effects of each plasmid individually (epistasis). For  
203 example, there is empirical evidence of positive epistasis (i.e. reduced fitness costs) between  
204 co-infecting plasmids [18, 21], which could stem from down-regulation of the conjugation ma-  
205 chinery [57] (see below) and/or a decrease in the number of individual plasmid copies per cell  
206 [58]. Epistatic effects could also arise from interactions between plasmid cargo genes (e.g.  
207 resistance to the same antibiotic).

208 **Conjugation from co-infected cells** A key characteristic of conjugative plasmids is their  
209 ability to transmit themselves horizontally to neighbouring cells, which requires the expres-  
210 sion of transfer genes from the plasmid, and close proximity between the recipient and donor  
211 cell.

212 To reduce the burden on the host, the conjugation machinery is generally down-regulated ('re-  
213 pressed') and not active at all times [59]. Plasmids typically carry fertility inhibition (FI) systems,  
214 which inhibit conjugation, either as an auto-regulatory mechanism (F plasmids), or to inhibit  
215 transfer of unrelated, co-resident plasmids [10, 60] (Table S2). Activation is also influenced by  
216 diverse factors such as host cell physiology, the availability of recipients, or stress factors like  
217 antibiotics [61, 62]. Such external activation signals can de-repress both co-infecting plasmids,  
218 increasing the chance of simultaneous transfer [63].

219 Co-infecting plasmids can affect each other's individual conjugation rates ( $q_A$ ,  $q_B$ ), as well as  
220 transfer simultaneously during a single mating event (co-transfer;  $\beta_{AB}$ ). Effects on individual  
221 conjugation rates during co-infection are common (63% of tested plasmid pairs), although typ-  
222 ically only one plasmid is influenced (53% of plasmid pairs) [20]. In this case, a reduction in  
223 conjugation rate is more common (30%) than an increase (23%) [20].

224 Co-transfer of plasmids can occur through the same type IV secretion system (T4SS), or by  
225 expression of several systems simultaneously. Mobilisable plasmids can 'hitch-hike' along with  
226 the T4SS of a conjugative plasmid, if they encode compatible transfer determinants [22, 23].  
227 Transfer via the same T4SS can also occur with plasmid co-integrates [64], which arise through  
228 fusion of plasmid variants.

229 In the case of multiple co-resident, conjugative plasmids, simultaneous expression of secretion  
230 systems could stabilise the mating pair, thus allowing efficient co-transfer [20]. However, deter-  
231 mination of the true rate of conjugative co-transfer is difficult as 'simply' counting the number of  
232 recipients that received both plasmids makes it difficult to distinguish whether a single or two  
233 subsequent mating events took place. This may explain the variation in empirical co-transfer  
234 reports, showing frequent co-transfer in a system with large and small plasmids [65], and in an  
235 engineered system with conjugative plasmids [63], but little in another system with conjugative  
236 plasmids from natural isolates [66].

237 The effect of co-infection on conjugation can be modelled in the following ways (Table 1):

- 238 • FI systems decrease the single and co-conjugation rate ( $q_i$ ,  $\beta_{AB}$ ) of co-resident plasmids,  
239 resulting in up to 10,000-fold lower conjugation rates [60]. Lower conjugation rates might

- 240 in turn decrease the plasmid burden on the host cell ( $\gamma_{AB}, \rho_{AB}$ ) [57].
- 241 • Co-transfer rates of co-resident plasmids are largely unknown, but have been proposed  
242 to occur at the rate set by the lower conjugation frequency ( $\beta_{AB} = \min(\beta_A, \beta_B)$ ) [63].
  - 243 • Co-integrates, i.e. fused plasmid variants, can increase (higher probability of expressing  
244 at least one conjugation machinery) [67] or decrease (lower mating pair stability) the rate  
245 of co-conjugation ( $\beta_{AB}$ ), and hence the total conjugation frequency of individual plasmids  
246 ( $q_i\beta_i + \beta_{AB} \leq \beta_i$ ). Note that our model only captures this process if co-integrates are  
247 resolved again.

248 **Cis-acting prevention of co-infection** Conjugative plasmids carry genes with which they  
249 can prevent co-infection by plasmids from the same exclusion class (i.e. cis-acting) [7]. This  
250 serves to reduce i) within-host competition between plasmids, ii) the metabolic burden of conju-  
251 gation on donor cells, and iii) recipient death due to excessive DNA transfer (lethal zygosis) [7].  
252 There are two types of exclusion systems: surface exclusion (SFX), which inhibits the ability  
253 to form stable mating pairs, and entry exclusion (EEX), which inhibits DNA transfer across the  
254 mating channel. While the latter is found in nearly all conjugative plasmids, only plasmids with  
255 pili that firmly attach to the recipient cell code for surface exclusion [7, 60].

256 For F plasmids, entry exclusion was found to be around 10 times more effective than surface  
257 exclusion [9, 25, 26, 68]. Together, these systems can generate differences in plasmid transfer  
258 between 100-10'000-fold (individually, 200- and 20-fold for EEX and SFX, respectively) [25, 26,  
259 68]. Similarly, 10-10'000-fold reductions in transfer have been observed for EEX with other  
260 incompatibility groups [7, 69]. The width of this range is likely due to differences in plasmid  
261 copy number, as exclusion was found to be gene dosage dependent [7, 68, 69].

262 Despite the ubiquity of exclusion systems, in practice their impact remains unclear. First, there  
263 is substantial genetic diversity between SFX and EEX genes, and how this translates into the  
264 exclusion phenotype is not well understood. Within the group of F-like plasmids, at least four  
265 different surface exclusion groups were identified [70], where specificity was determined only  
266 by a difference of 5 amino acids [71]. The EEX gene is less conserved than the SFX gene:  
267 homologous EEX genes were found in only 30% of 256 F-plasmids [72]. Second, certain broad  
268 host range plasmids exhibit 'retrotransfer', whereby the plasmid is transferred into a recipient,  
269 'captures' chromosomal genes or a mobilisable plasmid from that recipient, and is then able to  
270 transfer back into the original plasmid-carrying host [73]. Third, little is known about the effect  
271 co-resident plasmids have on exclusion. In one experiment, a donor with two plasmids carrying  
272 different SFX systems managed to infect a recipient with either one of these plasmids [70].  
273 Fourth, plasmids can bypass exclusion systems by being taken up via a different route (e.g. via  
274 transformation, transduction or vesiculation) [1]. Lastly, exclusion is not active when recipients  
275 are in stationary phase [70, 74], allowing infection by plasmids from metabolically active donors,  
276 or by plasmids that can conjugate in stationary phase [61].

277 In our model, the parameters describing co-infection susceptibility  $k_{i,j}$  and displacement  $k_{i,AB}$   
278 can account for exclusion (Table 1):

- 279 • If exclusion systems are highly effective, modelling co-infection is only relevant for plas-  
280 mids of different exclusion groups. Co-infected cells would exclude further entry and  
281 displacement by either plasmid type ( $k_{i,AB} = 0$ ).
- 282 • With less effective exclusion systems, cells may be infected by plasmids of the same ex-  
283 clusion group. Displacement  $k_{i,AB}$  is thus greater than 0, independent of the exclusion  
284 group of plasmid  $A$  and  $B$ . If co-infecting plasmids are of the same exclusion and incom-  
285 patibility group, then  $k_{i,AB}$  is constrained to  $k_{i,AB} = \frac{k_{i,j}}{2}$  to retain structural neutrality (see  
286 Supplementary Text 3) [36].

287 **Trans-acting prevention of co-infection** Plasmids can also affect the entry and establish-  
288 ment of other variants into a cell in trans, for example via restriction modification (RM) systems  
289 and CRISPR (clustered regularly interspaced short palindromic repeats) plus associated Cas  
290 genes (CRISPR associated systems) [60, 75, 76].

291 Restriction-modification systems consist of two functional parts: one cleaves DNA at specific  
292 restriction sites, and the other continuously modifies (methylates) these sites to avoid cleavage.  
293 This serves primarily as defence against incoming, non-methylated DNA, which will be cleaved

294 upon entry. DNA within the same cell is protected, as long as methylation is actively maintained.  
 295 If an RM system is lost and the methylation wears off, the remaining restriction endonucleases  
 296 can kill the cell (i.e. akin to post-segregational killing by TA systems). RM systems are typi-  
 297 cally located on the chromosome, but are also found in approximately 20% of mobilisable and  
 298 conjugative plasmids [77]. A resident RM-carrying plasmid can exclude incoming plasmids  
 299 with non-methylated restriction sites [78, 79]. In the case of co-infecting, incompatible plas-  
 300 mids, post-segregational killing will also introduce an advantage for the plasmid with the RM  
 301 system [41, 80]. On the other hand, co-infecting compatible plasmids with RM systems may  
 302 improve each others conjugation success, by modifying restriction sites that would otherwise  
 303 be targeted upon entry into a recipient with an RM system.

304 CRISPR-Cas are also used by bacteria to defend against mobile genetic elements (MGEs).  
 305 They typically consist of a ‘library’ of DNA fragments from past MGE infections (called ‘spac-  
 306 ers’), and a system that cleaves any of those sequences once they are found in the cell [76].  
 307 CRISPR arrays, isolated cas genes, and entire CRISPR-Cas have been found on plasmids [75,  
 308 76]. CRISPR Type IV systems are almost exclusively found on plasmids, and interestingly, their  
 309 spacers exhibit a strong bias towards other plasmids, specifically the transfer genes of con-  
 310 jugative plasmids [75]. Such systems can keep competing plasmids from establishing in the  
 311 cell. Importantly, plasmid and chromosomal CRISPR-Cas can acquire immunity to plasmids  
 312 they were previously (co-)infected with, thus shaping future infection dynamics.

313 Trans-acting exclusion systems can be implemented as follows:

- 314 • They lower the chance of successful plasmid transfer to recipients already carrying a  
 315 plasmid (i.e.  $k_{i,j} < 1$ ).
- 316 • Post-segregational host killing due to plasmid-borne RM systems can be modelled similar  
 317 to a TA system (see above).

| Biological process        | Model parameter                            | Mechanism                                                                                                 |
|---------------------------|--------------------------------------------|-----------------------------------------------------------------------------------------------------------|
| Replication               | $m_i, s_{AB}$                              | Crosstalk in replication regulation                                                                       |
| Replication, Partitioning | $q_i$                                      | Decreased number of plasmid copies (gene dosage)                                                          |
| Partitioning, Segregation | $m_i, s_{AB}$                              | Crosstalk in partitioning components                                                                      |
| Segregation               | $s_i$                                      | Stochasticity in plasmid inheritance (single infection)                                                   |
|                           | $s_i(1-x), m_i(1-x)$                       | TA-induced stabilization (single and double infection)                                                    |
| Cell growth               | $\rho_i, \gamma_i$                         | Toxin inhibition of cell metabolism                                                                       |
|                           | $\rho_{AB}, \gamma_{AB}$                   | Epistasis in plasmid costs                                                                                |
|                           | $\rho_{AB}, \gamma_{AB}$                   | Fertility inhibition systems                                                                              |
| Conjugation, Donor        | $\beta_{AB}, q_i$                          | Fertility inhibition systems                                                                              |
|                           | e.g. $\beta_{AB} = \min(\beta_A, \beta_B)$ | Synchronized de-repression of conjugation machineries (co-transfer)                                       |
|                           | $q_i, \beta_{AB}$                          | Co-integrates                                                                                             |
| Conjugation, Recipient    | $k_{i,j}, k_{i,AB}$                        | Exclusion systems (cis- or trans-acting)                                                                  |
|                           | $k_{i,j}, k_{i,AB}$                        | High probability of loss immediately after co-infection due to replication (partitioning) incompatibility |
|                           | $k_{i,AB}$                                 | TA-induced death                                                                                          |

Table 1: Summary of biological processes relating to co-infection and their relation to model parameters.

## 318 4 Model application

319 In this section, we examine the influence of modelled co-infection processes on plasmid di-  
 320 versity. Our aim is to provide qualitative conceptual insights; the scale of our parameters is



321 therefore arbitrary (Supplementary Table S1). We begin by considering two ecologically indistinguishable plasmid variants. This means that parameters values are identical for both  
 322 variants ( $\beta_A = \beta_B = \beta_{AB}$ ,  $k_{A,B} = k_{B,A}$ , etc.; Supplementary Table S1). Further, by fulfilling a specific set of requirements (see Supplementary Text 3), we ensure that the model structure  
 323 does not implicitly introduce an ecological difference between the variants ('structural neutrality') [36].  
 324  
 325  
 326

#### 327 4.1 Influence of model parameters on co-infection

328 We begin by providing an intuition for the link between various model parameters and plasmid co-infection states by exploring the parameter space for plasmid conjugation ( $\beta_i$ ), infection susceptibility ( $k_{i,j}$ ), partial segregation loss ( $m_i$ ) and plasmid cost ( $c_i$ , defined here as a decrease in replication rate due to plasmid carriage:  $\rho_i = \rho_0(1 - c_i)$ ). We randomly sample these parameters 6100 times (Supplementary Table S1) and classify the population output at steady state into the following outcomes: 'no plasmid' ( $P_0$ ), 'high co-infection' ( $P_{AB}$ ) or 'low co-infection' ( $P_A$  and  $P_B$ ). The frequencies of each class over the whole data set show by far the highest prevalence of high co-infection (Figure 2A).  
 329  
 330  
 331  
 332  
 333  
 334  
 335

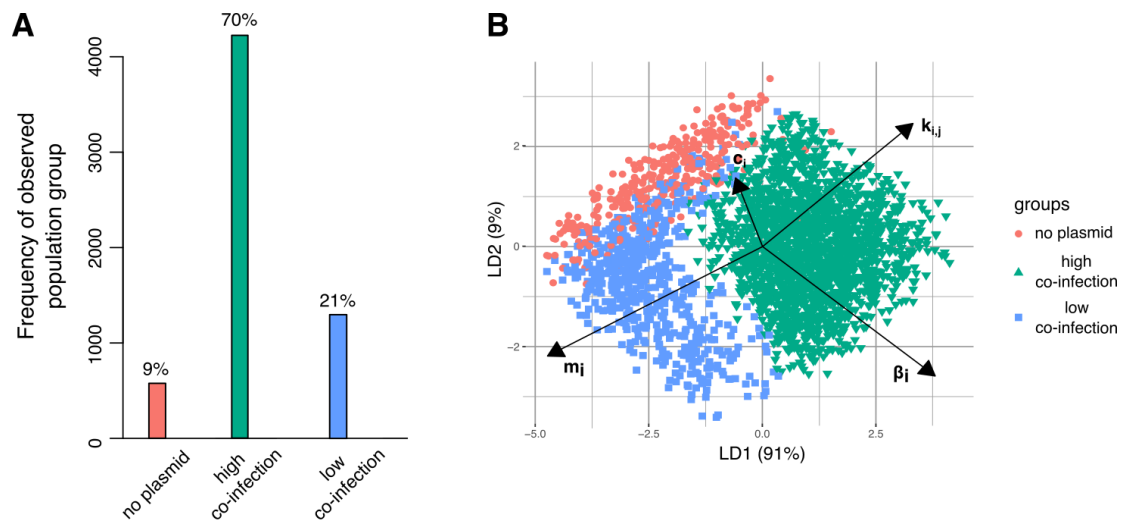

Figure 2: **Parameter space exploration using linear discriminant analysis.** **A.** Probability of each class over all simulation outcomes. Frequencies of each class at the end of 500 time steps - 'no plasmid' (red), 'co-existence due to co-infection' (green) or 'co-existence without co-infection' (blue) - are given for 6100 parameter sets randomly sampled over  $[0,0.5]$  for  $m_i$  and  $[0,1]$  for  $k_{i,j} = 2k_{i,AB}$ ,  $\beta_i$ ,  $c_i$ . **B.** LDA using the 3 classes shown in A (same color scheme). Arrows show the magnitude and direction of the parameters varied (e.g. the shorter arrow of  $c_i$  indicates lower significance of this parameter in class separation, whereas  $m_i$  and  $k_{i,j}$  ( $k_{i,AB}$ ) are most important in separating high from low co-infection areas).

336 Next, we identify the impact of each parameter on population dynamics using linear discriminant analysis (LDA). Briefly, LDA maximally separates the parameter regions, which tend to  
 337 result in the different classes defined above [81]. We find that the most significant factors separating the two co-infection classes are susceptibility and partial segregation loss (as shown  
 338 by the parameter arrows in Figure 2B), with increases in  $k_{i,j}$  leading to more co-infections and increases in  $m_i$  resulting in more single infections. The 'no plasmid' class is separated from the  
 339 other two by low conjugation rates and high costs. While higher conjugation rates lead to more plasmid carriage in general, the direction of the arrow indicates that co-infections are relatively  
 340 more increased. Notably, the magnitude of plasmid cost has the least influence on population outcome among these parameters, though this result may be sensitive to the overall parametrisation.  
 341  
 342  
 343  
 344  
 345  
 346  
 347

## 348 4.2 Co-infection affects evolutionary outcomes through frequency-dependent 349 selection

350 To explore the impact of co-infection on evolutionary outcomes, we again consider two ecolog-  
351 ically indistinguishable plasmids variants. In a deterministic simulation, such indistinguishable  
352 competitors simply remain at their initial frequencies (Figure 3A). However, varying certain  
353 co-infection parameters (specifically,  $\rho_{AB}$ ,  $\gamma_{AB}$ ,  $q_i$ ,  $\beta_{AB}$ ,  $g_i$  or the ratio between  $k_{i,j}$  and  $k_{i,AB}$ ),  
354 while keeping all other parameter values identical for the two plasmid variants, changes plasmid  
355 dynamics by introducing frequency-dependent selection. This link between specific co-infection  
356 parameters and frequency-dependent selection is derived in Supplementary Text 3 and verified  
357 by simulation (Figure S2, Figure S3). The general insight (Figure 3A) is that frequency depen-  
358 dence arises from the impact of co-infection on the plasmid variants: when co-infection is  
359 beneficial for both co-residents, we observe negative frequency-dependent selection (NFDS);  
360 when it is detrimental to both variants, we observe positive frequency-dependent selection  
361 (PFDS).

362 This frequency-dependence arises because the frequency of a plasmid variant determines the  
363 relative contribution of the co-infected state to its overall reproductive success, which depends  
364 on both  $P_A$  ( $P_B$ ) and  $P_{AB}$ . If variant A is rarer than variant B ( $P_A < P_B$ ), the co-infected  
365 state makes up a larger proportion of the overall density of plasmid A ( $P_{AB}/(P_{AB} + P_A) >$   
366  $P_{AB}/(P_{AB} + P_B)$ ). Therefore, if the co-infected state is beneficial for both plasmids, rare vari-  
367 ants have an advantage, which will equalise variant frequencies. Conversely, if the co-infected  
368 state is detrimental, rare variants have a disadvantage, allowing the variant with a higher initial  
369 frequency to exclude the other. Intuitively, the co-infected state is beneficial when co-infected  
370 cells have a higher net growth rate; an overall higher conjugation rate; a lower probability of  
371 complete segregation loss; or are less susceptible to further infection with other plasmids (Sup-  
372 plementary Text 3).

373 Next, we explore the effect of introducing a fitness difference between the plasmids (Figure 3B).  
374 As expected, both NFDS and PFDS can lead to persistence of the lower fitness variant: NFDS  
375 by allowing co-existence of the two competitors, and PFDS by preventing the higher fitness  
376 variant from invading a population in which the lower fitness variant is already established. In  
377 both cases, whether the lower fitness variant is maintained depends on the strength of the  
378 frequency-dependent selection relative to the fitness difference. The frequency-dependent ef-  
379 fect is stronger when co-infection is common. Thus, parameters which do not themselves  
380 introduce frequency-dependent selection but affect the frequency of the co-infected state (e.g.  
381  $m_i$  and  $k_{i,j}$ ), can influence evolutionary outcomes by modulating the strength of frequency-  
382 dependent effects.

383 Finally, we consider the impact of asymmetric co-infection related effects. Thus far, we analysed  
384 effects which are equally beneficial or detrimental for both co-infecting variants: either because  
385 they impact properties of the host cell (e.g.  $rho_{AB}$ ), or because we have assumed within-host  
386 interactions to be symmetric (e.g.  $q_A = q_B$ ,  $m_A = m_B, \dots$ ). However, within-host interactions  
387 can also be asymmetric (see Section 3): for example, between incompatible plasmids, an  
388 advantage in replication and/or partitioning would translate to a difference in partial segregation  
389 loss ( $m_i < m_j$ ) and conjugation from co-infected cells ( $q_i > q_j$ ) through changes in within-cell  
390 variant frequencies. Such asymmetric effects give one of the variants a competitive advantage  
391 (Figure S4), but do not, in themselves, introduce frequency-dependent effects (Supplementary  
392 Text 1.4).

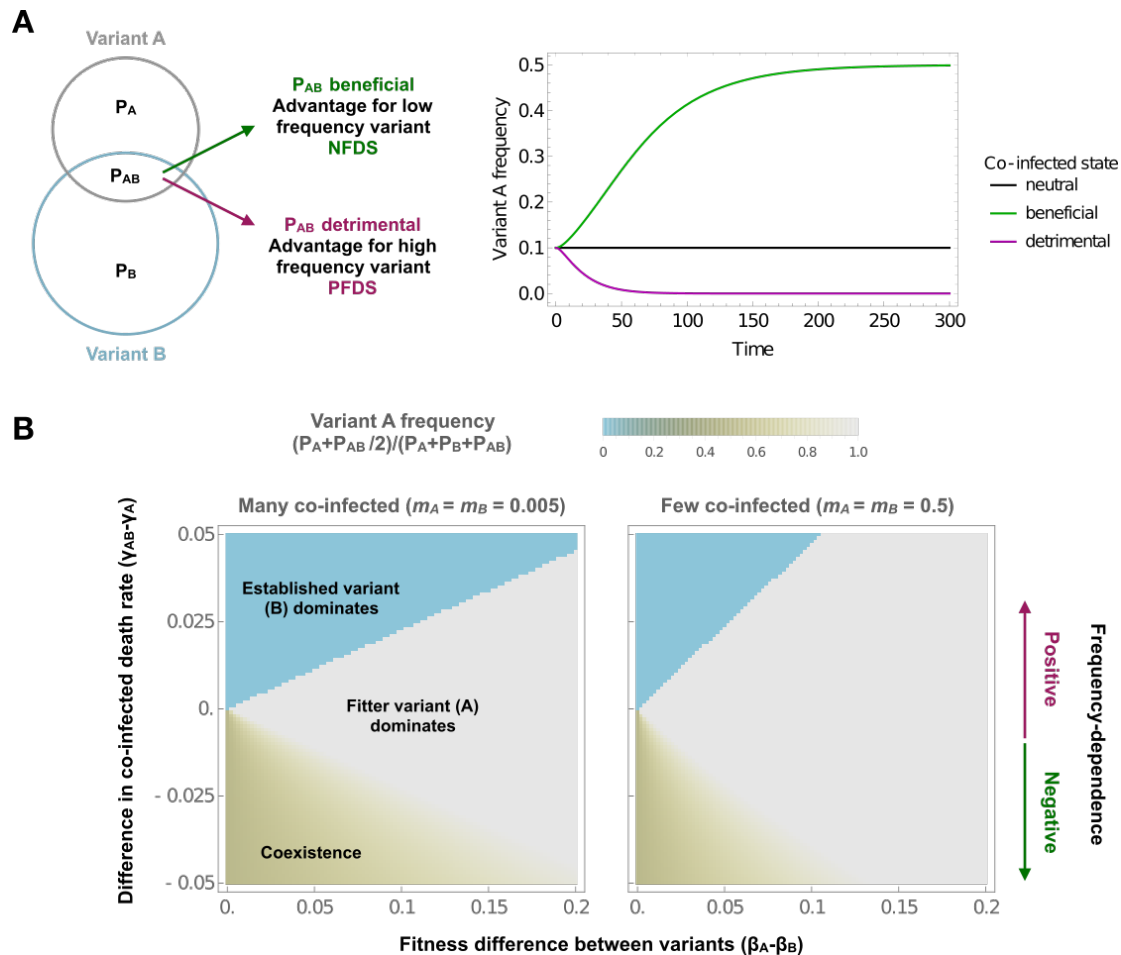

Figure 3: **Co-infection affects evolutionary outcomes through frequency-dependent selection.** **A.** The effect of the co-infected state on the outcome of competition between two plasmid variants with identical properties. When the co-infected state is neither beneficial nor detrimental, there is no frequency-dependent selection and the plasmid variants remain at their initial frequencies. A co-infection related advantage for both variants introduces negative frequency-dependent selection, which equalises variant frequencies and leads to co-existence. A co-infection related disadvantage introduces positive frequency-dependent selection, which leads to the exclusion of the variant with a lower initial frequency. **B.** The effect of frequency-dependent selection on evolutionary outcomes in presence of fitness differences. The figures show the equilibrium frequency of a variant with a fitness advantage but with low initial frequency ( $P_A = 0.001$  and  $P_B = 1$  at  $t = 0$ ). The color indicates the equilibrium frequency of variant A (here defined as  $P_A + P_{AB}/2$  at  $t = 300000$ ). The x-axis captures the extent of the fitness difference, here implemented as a difference in conjugation rate ( $\beta_i$ ). The y-axis captures the strength and direction of the frequency-dependent selection, here implemented by varying the death rate ( $\gamma_i$ ) of the co-infected cells. For both plots, standard parameter values are:  $\rho_0 = 1$ ,  $\rho_A = \rho_B = \rho_{AB} = 0.9$ ,  $\gamma_i = 0.1$ ,  $\beta_A = \beta_B = 0.2$ ,  $\beta_{AB} = 0$ ,  $m_i = 1/3$ ,  $q_i = 1/2$ ,  $s_i = 1/1000$ ,  $k_{A,B} = k_{B,A} = 1/2$ ,  $k_{A,AB} = k_{B,AB} = 1/4$

## 393 5 Discussion

394 This work provides an overview of the biological processes relevant in plasmid co-infection  
 395 (Section 3) and discusses how they can be captured appropriately in a modeling framework  
 396 (Section 2). We demonstrate how this general framework can be applied to understand how  
 397 co-infection parameters shape plasmid variant selection and diversity.

398 Depending on the underlying processes, the co-infected state can be either beneficial or detri-  
 399 mental for the plasmid variants. Benefits arise for example from 'collaborative' (i.e. higher  
 400 overall) conjugation from co-infected cells; positive epistasis in host fitness (reduced plasmid  
 401 cost or higher plasmid benefit); or distinct cis-acting exclusion systems (protecting the cell from

402 further infection with either variant). We would therefore expect negative frequency-dependent  
403 selection to maintain diversity in these traits. Conversely, with negative epistasis or addiction  
404 systems co-infection would be detrimental, making displacement of established variants difficult  
405 due to positive frequency-dependent selection. Finally, replication or partitioning incompatibil-  
406 ity does not in itself lead to frequency-dependent selection, but does modulate its strength by  
407 decreasing the density of co-infected cells.

408 These co-infection related effects also have implications on the evolutionary trajectories of bac-  
409 terial populations more broadly. Co-infection influences the rate at which bacterial populations  
410 acquire new genes through plasmid transfer: the entry of plasmids from other bacterial cells  
411 or species is influenced by the presence of a resident plasmid [7, 17]. By promoting the intro-  
412 duction of new variants, negative frequency dependence can act to increase the acquisition of  
413 plasmids from other bacterial populations/species. Conversely, positive frequency dependence  
414 can act as a barrier to new plasmids entering the population, thus slowing this acquisition.  
415 Secondly, co-infection governs the extent of plasmid gene sharing. When present in the same  
416 cell, plasmids can exchange genetic material through e.g. recombination [64, 82]. Frequency-  
417 dependent effects would also be expected to influence the mobility of genes between plasmids  
418 (or plasmid and chromosome [83]). For example, if the presence of the same cargo gene  
419 on (compatible) co-resident plasmids gives rise to negative epistasis between the plasmids  
420 (due to negative gene dosage effects), the resulting PFDS would constrain gene mobility: the  
421 disadvantage associated with low frequency variants would prevent plasmids that have newly  
422 acquired the cargo gene from increasing in frequency.

423 Our results are closely linked to previous theoretical work on epidemiological models of co-  
424 infection [36], which has highlighted how model structure can include coexistence-promoting  
425 mechanisms. Specifically, the motivating concern of this previous work was that models of co-  
426 infection typically implicitly and unintentionally assumed that a host carrying one strain would  
427 be susceptible to co-infection with another strain, but protected from re-infection with itself:  
428 co-infection was possible, but displacement was neglected. This is akin to assuming cis-acting  
429 exclusion. In models of plasmid co-infection, this specific concern is, to some extent, less acute  
430 cis-acting exclusion systems are thought to be widespread among conjugative plasmids [7]. If  
431 these systems are indeed as effective *in vivo* as *in vitro* data suggest, co-infection only occurs  
432 between plasmids of different exclusion groups and co-infected cells are therefore indeed not  
433 susceptible to displacement. Furthermore, when considering variants of the same backbone  
434 with and without a particular cargo gene, it is appropriate to exclude co-infection [11, 83]. On the  
435 other hand, our results highlight that frequency-dependent effects also arise from other model  
436 features. Many of these effects are linked to copy number, making evolutionary outcomes  
437 heavily dependent on how co-infecting plasmids influence each others' copy numbers. It is  
438 thus important to be explicit about the traits of the modelled variants and aware that results  
439 may not generalise for different assumptions about plasmid backbones.

440 A key feature of the framework discussed here is that cells are tracked in terms of the plasmid  
441 variants they carry, without explicitly incorporating plasmid copy number: each cell type ( $P_0$ ,  
442  $P_A$ ,  $P_B$ ,  $P_{AB}$ ) is represented in terms of the average cell, and heterogeneity within cell types  
443 is ignored. This is a standard approximation in compartmental models, but warrants additional  
444 discussion in the context of co-infection. Firstly, this approximation can make the link between  
445 model and biological processes less intuitive and complicates parametrisation, as processes  
446 which change within-cell plasmid frequencies have to be represented in terms of average plas-  
447 mid loss. Secondly, by representing the co-infected state as a single variable, the average  
448 frequency of plasmid variants within co-infected cells is implicitly specified. This highlights the  
449 importance of carefully considering how certain parameters values depend on relative plas-  
450 mid frequencies (e.g.  $k$ ,  $m$ ,  $q$ ), particularly when modelling plasmids where one variant has a  
451 within-cell competitive advantage and thus the variant frequencies within-co-infected cells are  
452 not equal. Overall, the contexts in which explicit models of plasmid copy number are not satis-  
453 factorily approximated by average copy numbers warrants further exploration (Supplementary  
454 Text 2.2).

455 To truly understand the eco-evolutionary implications of co-infection, more empirical research is  
456 needed on its natural occurrence and distribution. This includes population-level studies inves-  
457 tigating the prevalence of plasmid co-infection across bacterial phyla, as well as its correlation  
458 with incompatibility group, plasmid size, and copy number. Further, while studied in detail at the  
459 mechanistic level, little is known about the natural diversity and phenotypic effects of various  
460 exclusion and TA systems. Carefully designed bioinformatics studies could address some of

461 these questions. However, sequencing databases are currently not representative of natural  
462 microbial diversity, and the meta-data to account for phylogenetic, geospatial, or phenotypic  
463 biases is often lacking [84]. Additionally, plasmids may not be represented accurately in the  
464 deposited genomes [85, 86], complicating conclusions on overall plasmid co-infection.

465 A combination of empirical and theoretical approaches is necessary to iteratively refine our  
466 understanding of plasmid diversity: on the one hand, using empirical data to inform model  
467 parameter values and processes, and on the other, evaluating the results of simulations against  
468 natural observations. In particular, combining insights into the mechanistic effects of specific  
469 traits from experimental studies and data on the distribution of these traits in natural plasmid  
470 populations is a crucial step, and modelling can provide an important tool in bridging these two  
471 levels of observation. Through careful consideration of the biological processes and potential  
472 modelling pitfalls relating to plasmid co-infection, we have developed a modelling framework  
473 which can serve as a basis for such future work.

## References

- [1] Jerónimo Rodríguez-Beltrán et al. “Beyond horizontal gene transfer: the role of plasmids in bacterial evolution”. In: *Nature Reviews Microbiology* (Jan. 2021), pp. 59–66. ISSN: 1740-1526. DOI: [10.1038/s41579-020-00497-1](https://doi.org/10.1038/s41579-020-00497-1).
- [2] Howard Ochman, Jeffrey G Lawrence, and Eduardo A Groisman. “Lateral gene transfer and the nature of bacterial innovation”. In: *nature* 405.6784 (2000), p. 299.
- [3] José L. Martínez and Fernando Baquero. “Interactions among Strategies Associated with Bacterial Infection: Pathogenicity, Epidemicity, and Antibiotic Resistance”. In: *Clinical Microbiology Reviews* 15.4 (Oct. 2002), pp. 647–679. ISSN: 0893-8512. DOI: [10.1128/CMR.15.4.647-679.2002](https://doi.org/10.1128/CMR.15.4.647-679.2002).
- [4] Amy J Mathers, Gisele Peirano, and Johann D.D. Pitout. “The role of epidemic resistance plasmids and international high- risk clones in the spread of multidrug-resistant Enterobacteriaceae”. In: *Clinical Microbiology Reviews* 28.3 (2015), pp. 565–591. ISSN: 10986618. DOI: [10.1128/CMR.00116-14](https://doi.org/10.1128/CMR.00116-14).
- [5] Nileena Velappan et al. “Plasmid incompatibility: More compatible than previously thought?” In: *Protein Engineering, Design and Selection* 20.7 (2007), pp. 309–313. ISSN: 17410126. DOI: [10.1093/protein/gzm005](https://doi.org/10.1093/protein/gzm005).
- [6] David K. Summers and David J. Sherratt. “Multimerization of high copy number plasmids causes instability: Cole 1 encodes a determinant essential for plasmid monomerization and stability”. In: *Cell* 36.4 (Apr. 1984), pp. 1097–1103. ISSN: 00928674. DOI: [10.1016/0092-8674\(84\)90060-6](https://doi.org/10.1016/0092-8674(84)90060-6).
- [7] M. Pilar Garcillán-Barcia and Fernando de la Cruz. “Why is entry exclusion an essential feature of conjugative plasmids?” In: *Plasmid* 60.1 (July 2008), pp. 1–18. ISSN: 0147619X. DOI: [10.1016/j.plasmid.2008.03.002](https://doi.org/10.1016/j.plasmid.2008.03.002).
- [8] Tim F. Cooper and Jack A. Heinemann. “Postsegregational killing does not increase plasmid stability but acts to mediate the exclusion of competing plasmids”. In: *Proceedings of the National Academy of Sciences of the United States of America* 97.23 (2000), pp. 12643–12648. ISSN: 00278424. DOI: [10.1073/pnas.220077897](https://doi.org/10.1073/pnas.220077897).
- [9] Laura S. Frost and Günther Koraimann. “Regulation of bacterial conjugation: Balancing opportunity with adversity”. In: *Future Microbiology* 5.7 (2010), pp. 1057–1071. ISSN: 17460913. DOI: [10.2217/fmb.10.70](https://doi.org/10.2217/fmb.10.70).
- [10] María Getino et al. “PifC and Osa, Plasmid Weapons against Rival Conjugative Coupling Proteins”. eng. In: *Frontiers in microbiology* 8 (2017), pp. 2260–2260. ISSN: 1664-302X.
- [11] Fabian Svava and Daniel J. Rankin. “The evolution of plasmid-carried antibiotic resistance”. eng. In: *BMC Evolutionary Biology* 11 (May 2011), p. 130. ISSN: 1471-2148. DOI: [10.1186/1471-2148-11-130](https://doi.org/10.1186/1471-2148-11-130).
- [12] M Rozwandowicz et al. “Plasmids carrying antimicrobial resistance genes in Enterobacteriaceae”. en. In: *Journal of Antimicrobial Chemotherapy* 73.5 (May 2018), pp. 1121–1137. ISSN: 0305-7453, 1460-2091. DOI: [10.1093/jac/dkx488](https://doi.org/10.1093/jac/dkx488).
- [13] Z. Piotrowska-Seget, M. Cycoń, and J. Kozdrój. “Metal-tolerant bacteria occurring in heavily polluted soil and mine spoil”. en. In: *Applied Soil Ecology* 28.3 (Mar. 2005), pp. 237–246. ISSN: 0929-1393. DOI: [10.1016/j.apsoil.2004.08.001](https://doi.org/10.1016/j.apsoil.2004.08.001). (Visited on 06/13/2020).
- [14] Timothy J. Johnson and Lisa K. Nolan. “Pathogenomics of the Virulence Plasmids of *Escherichia coli*”. In: *Microbiology and Molecular Biology Reviews : MMBR* 73.4 (Dec.

- 2009), pp. 750–774. ISSN: 1092-2172. DOI: [10.1128/MMBR.00015-09](https://doi.org/10.1128/MMBR.00015-09). (Visited on 04/29/2020).
- [15] Margaret A. Riley and John E. Wertz. “Bacteriocins: Evolution, Ecology, and Application”. In: *Annual Review of Microbiology* 56.1 (2002), pp. 117–137. DOI: [10.1146/annurev.micro.56.012302.161024](https://doi.org/10.1146/annurev.micro.56.012302.161024). (Visited on 06/13/2020).
- [16] Laura Villa et al. “Replicon sequence typing of IncF plasmids carrying virulence and resistance determinants”. In: *Journal of Antimicrobial Chemotherapy* 65.12 (Dec. 2010), pp. 2518–2529. ISSN: 03057453. DOI: [10.1093/jac/dkq347](https://doi.org/10.1093/jac/dkq347).
- [17] Miranda Sherley, David M Gordon, and Peter J Collignon. “Species differences in plasmid carriage in the Enterobacteriaceae”. In: *Plasmid* 49.1 (2003), pp. 79–85.
- [18] Alvaro San Millan, Karl Heilbron, and R. Craig MacLean. “Positive epistasis between co-infecting plasmids promotes plasmid survival in bacterial populations”. In: *ISME Journal* 8.3 (2014), pp. 601–612. ISSN: 17517362. DOI: [10.1038/ismej.2013.182](https://doi.org/10.1038/ismej.2013.182).
- [19] Richard P. Novick. “Plasmid incompatibility.” In: *Microbiological reviews* 51.4 (Dec. 1987), pp. 381–95. ISSN: 0146-0749. DOI: [10.1016/0147-619X\(78\)90001-X](https://doi.org/10.1016/0147-619X(78)90001-X).
- [20] João Alves Gama, Rita Zilhão, and Francisco Dionisio. “Conjugation efficiency depends on intra and intercellular interactions between distinct plasmids: Plasmids promote the immigration of other plasmids but repress co-colonizing plasmids”. In: *Plasmid* 93 (2017), pp. 6–16. ISSN: 0147-619X. DOI: <https://doi.org/10.1016/j.plasmid.2017.08.003>.
- [21] Elise R. Morton et al. “Non-additive costs and interactions alter the competitive dynamics of co-occurring ecologically distinct plasmids”. In: *Proceedings of the Royal Society B: Biological Sciences* 281.1779 (2014). ISSN: 14712954. DOI: [10.1098/rspb.2013.2173](https://doi.org/10.1098/rspb.2013.2173).
- [22] Chris Smillie et al. “Mobility of Plasmids”. In: *Microbiology and Molecular Biology Reviews* 74.3 (2010), pp. 434–452. ISSN: 1092-2172. DOI: [10.1128/mnbr.00020-10](https://doi.org/10.1128/mnbr.00020-10).
- [23] Joshua P. Ramsay and Neville Firth. “Diverse mobilization strategies facilitate transfer of non-conjugative mobile genetic elements”. In: *Current Opinion in Microbiology* 38 (2017), pp. 1–9. ISSN: 18790364. DOI: [10.1016/j.mib.2017.03.003](https://doi.org/10.1016/j.mib.2017.03.003).
- [24] Jean Yves Bouet, Kurt Nordström, and David Lane. “Plasmid partition and incompatibility - The focus shifts”. In: *Molecular Microbiology* 65.6 (2007), pp. 1405–1414. ISSN: 0950382X. DOI: [10.1111/j.1365-2958.2007.05882.x](https://doi.org/10.1111/j.1365-2958.2007.05882.x).
- [25] Mark Achtman et al. “Genetic analysis of F sex factor cistrons needed for surface exclusion in *Escherichia coli*”. In: *Journal of Molecular Biology* 138.4 (1980), pp. 779–795. ISSN: 00222836. DOI: [10.1016/0022-2836\(80\)90065-0](https://doi.org/10.1016/0022-2836(80)90065-0).
- [26] Gerald F. Audette et al. “Entry exclusion in F-like plasmids requires intact TraG in the door that recognizes its cognate TraS in the recipient”. In: *Microbiology* 153.2 (2007), pp. 442–451. ISSN: 13500872. DOI: [10.1099/mic.0.2006/001917-0](https://doi.org/10.1099/mic.0.2006/001917-0).
- [27] K Ishizaki and E Ohtsubo. “Cointegration and resolution mediated by IS101 present in plasmid pSC101”. In: *Molecular & general genetics : MGG* 199.3 (1985), pp. 388–395. ISSN: 0026-8925. DOI: [10.1007/bf00330747](https://doi.org/10.1007/bf00330747).
- [28] Nelly van der Hoeven. “On conjugative plasmids: Mathematical models of their population dynamics and population genetics”. PhD thesis. 1985.
- [29] Allison J Lopatkin et al. “Persistence and reversal of plasmid-mediated antibiotic resistance”. eng. In: *Nature communications* 8.1 (2017), pp. 1689–1689. ISSN: 2041-1723.
- [30] R. Gregory, J.R. Saunders, and V.A. Saunders. “Rule-based modelling of conjugative plasmid transfer and incompatibility”. In: *Biosystems* 91.1 (2008), pp. 201–215. ISSN: 0303-2647. DOI: <https://doi.org/10.1016/j.biosystems.2007.09.003>.
- [31] João Alves Gama, Rita Zilhão, and Francisco Dionisio. “Plasmid Interactions Can Improve Plasmid Persistence in Bacterial Populations”. In: *Frontiers in Microbiology* 11 (2020), p. 2033. ISSN: 1664-302X. DOI: [10.3389/fmicb.2020.02033](https://doi.org/10.3389/fmicb.2020.02033).
- [32] Martin Werisch, Uta Berger, and Thomas U Berendonk. “Conjugative plasmids enable the maintenance of low cost non-transmissible plasmids”. eng. In: *Plasmid* 91 (2017), pp. 96–104. ISSN: 0147-619X.
- [33] BR Levin and FM Stewart. “The population biology of bacterial plasmids: a priori conditions for the existence of mobilizable nonconjugative factors”. In: *Genetics* 94.2 (Feb. 1980), pp. 425–443. ISSN: 0016-6731.
- [34] Richard Condit and Bruce R. Levin. “The Evolution of Plasmids Carrying Multiple Resistance Genes: The Role of Segregation, Transposition, and Homologous Recombination”. In: *The American Naturalist* 135.4 (1990), pp. 573–596. ISSN: 00030147, 15375323.
- [35] Judith A. Mongold. “Theoretical Implications for the Evolution of Postsegregational Killing by Bacterial Plasmids”. eng. In: *The American naturalist* 139.4 (1992), pp. 677–689. ISSN: 0003-0147.

- [36] Marc Lipsitch et al. "No coexistence for free: Neutral null models for multistrain pathogens". In: *Epidemics* 1.1 (2009), pp. 2–13. ISSN: 17554365. DOI: [10.1016/j.epidem.2008.07.001](https://doi.org/10.1016/j.epidem.2008.07.001).
- [37] Nicholas G. Davies et al. "Within-host dynamics shape antibiotic resistance in commensal bacteria". In: *Nature Ecology & Evolution* 3.3 (2019), p. 440.
- [38] Nicola Mulberry, Alexander Rutherford, and Caroline Colijn. "Systematic comparison of coexistence in models of drug-sensitive and drug-resistant pathogen strains". In: *Theoretical Population Biology* (2019).
- [39] Kohji Hasunuma and Mutsuo Sekiguchi. "Replication of plasmid pSC101 in *Escherichia coli* K12: Requirement for *dnaA* function". In: *MGG Molecular & General Genetics* 154.3 (1977), pp. 225–230. ISSN: 00268925. DOI: [10.1007/BF00571277](https://doi.org/10.1007/BF00571277).
- [40] S. J. Projan et al. "Replication properties of pIM13, a naturally occurring plasmid found in *Bacillus subtilis*, and of its close relative pE5, a plasmid native to *Staphylococcus aureus*." In: *Journal of bacteriology* 169.11 (1987), pp. 5131–5139. ISSN: 00219193. DOI: [10.1128/jb.169.11.5131-5139.1987](https://doi.org/10.1128/jb.169.11.5131-5139.1987).
- [41] Yasuhiro Naito, Taku Naito, and Ichizo Kobayashi. "Selfish restriction modification genes: Resistance of a resident R/M plasmid to displacement by an incompatible plasmid mediated by host killing". In: *Biological Chemistry* 379.4-5 (1998), pp. 429–436. ISSN: 14316730. DOI: [10.1515/bchm.1998.379.4-5.429](https://doi.org/10.1515/bchm.1998.379.4-5.429).
- [42] Kazushige Ishii, Tamotsu Hashimoto-Gotoh, and Kenichi Matsubara. "Random replication and random assortment model for plasmid incompatibility in bacteria". In: *Plasmid* 1.4 (Sept. 1978), pp. 435–445. ISSN: 0147619X. DOI: [10.1016/0147-619X\(78\)90002-1](https://doi.org/10.1016/0147-619X(78)90002-1).
- [43] Kurt Nordström and E. Gerhart H. Wagner. "Kinetic aspects of control of plasmid replication by antisense RNA". In: *Trends in Biochemical Sciences* 19.7 (1994), pp. 294–300. ISSN: 09680004. DOI: [10.1016/0968-0004\(94\)90008-6](https://doi.org/10.1016/0968-0004(94)90008-6).
- [44] Bin Shao et al. "Single-cell measurement of plasmid copy number and promoter activity". In: *Nature Communications* 12.1 (Dec. 2021), p. 1475. ISSN: 2041-1723. DOI: [10.1038/s41467-021-21734-y](https://doi.org/10.1038/s41467-021-21734-y).
- [45] Syam P. Anand and Saleem A. Khan. "Plasmid segregation: Birds of a feather try not to flock together". In: *Journal of Bacteriology* 192.5 (2010), pp. 1117–1174. ISSN: 00219193. DOI: [10.1128/JB.01551-09](https://doi.org/10.1128/JB.01551-09).
- [46] Maria A. Schumacher. "Bacterial plasmid partition machinery: A minimalist approach to survival". In: *Current Opinion in Structural Biology* 22.1 (2012), pp. 72–79. ISSN: 0959440X. DOI: [10.1016/j.sbi.2011.11.001](https://doi.org/10.1016/j.sbi.2011.11.001).
- [47] Jean-Yves Bouet and Barbara E. Funnell. "Plasmid Localization and Partition in Enterobacteriaceae". In: *EcoSal Plus* 8.2 (2019). ISSN: 2324-6200. DOI: [10.1128/ecosalplus.esp-0003-2019](https://doi.org/10.1128/ecosalplus.esp-0003-2019).
- [48] G. Ebersbach and K. Gerdes. "The double *par* locus of virulence factor pB171: DNA segregation is correlated with oscillation of *ParA*". In: *Proceedings of the National Academy of Sciences of the United States of America* 98.26 (2001), pp. 15078–15083. ISSN: 00278424. DOI: [10.1073/pnas.261569598](https://doi.org/10.1073/pnas.261569598).
- [49] Stuart Austin and Kurt Nordström. "Partition-mediated incompatibility of bacterial plasmids". In: *Cell* 60.3 (1990), pp. 351–354. ISSN: 00928674. DOI: [10.1016/0092-8674\(90\)90584-2](https://doi.org/10.1016/0092-8674(90)90584-2).
- [50] Jean Yves Bouet et al. "Probing plasmid partition with centromere-based incompatibility". In: *Molecular Microbiology* 55.2 (2005), pp. 511–525. ISSN: 0950382X. DOI: [10.1111/j.1365-2958.2004.04396.x](https://doi.org/10.1111/j.1365-2958.2004.04396.x).
- [51] Tatiana Dimitriu, Andrew Matthews, and Angus Buckling. "Increased copy number couples the evolution of plasmid horizontal transmission and antibiotic resistance". In: *bioRxiv* (2020), pp. 1–18. ISSN: 26928205. DOI: [10.1101/2020.08.12.248336](https://doi.org/10.1101/2020.08.12.248336).
- [52] Qiu E. Yang and Timothy R. Walsh. "Toxin-antitoxin systems and their role in disseminating and maintaining antimicrobial resistance". In: *FEMS Microbiology Reviews* 41.3 (2017), pp. 343–353. ISSN: 15746976. DOI: [10.1093/femsre/fux006](https://doi.org/10.1093/femsre/fux006).
- [53] Rasmus Bugge Jensen and Kenn Gerdes. "Programmed cell death in bacteria: proteic plasmid stabilization systems". In: *Molecular Microbiology* 17.2 (1995), pp. 205–210. ISSN: 13652958. DOI: [10.1111/j.1365-2958.1995.mmi\\_17020205.x](https://doi.org/10.1111/j.1365-2958.1995.mmi_17020205.x).
- [54] T. Ogura and S. Hiraga. "Mini-F plasmid genes that couple host cell division to plasmid proliferation." In: *Proceedings of the National Academy of Sciences of the United States of America* 80.15 (1983), pp. 4784–4788. ISSN: 00278424. DOI: [10.1073/pnas.80.15.4784](https://doi.org/10.1073/pnas.80.15.4784).

- [55] Sooyeon Song and Thomas K. Wood. “Post-segregational Killing and Phage Inhibition Are Not Mediated by Cell Death Through Toxin/Antitoxin Systems”. In: *Frontiers in Microbiology* 9.APR (Apr. 2018), pp. 1–6. ISSN: 1664-302X. DOI: [10.3389/fmicb.2018.00814](https://doi.org/10.3389/fmicb.2018.00814).
- [56] A. S.G. Smith and D. E. Rawlings. “Efficiency of the pTF-FC2 pas Poison-antidote stability system in *Escherichia coli* is affected by the host strain, and antidote degradation requires the Lon protease”. In: *Journal of Bacteriology* 180.20 (1998), pp. 5458–5462. ISSN: 00219193. DOI: [10.1128/jb.180.20.5458-5462.1998](https://doi.org/10.1128/jb.180.20.5458-5462.1998).
- [57] Rembrandt J F Haft, John E Mittler, and Beth Traxler. “Competition favours reduced cost of plasmids to host bacteria”. eng. In: *The ISME Journal* 3.7 (2009), pp. 761–769. ISSN: 1751-7362.
- [58] E. Harrison et al. “The cost of copy number in a selfish genetic element: The 2- $\mu$ m plasmid of *Saccharomyces cerevisiae*”. In: *Journal of Evolutionary Biology* 25.11 (2012), pp. 2348–2356. ISSN: 1010061X. DOI: [10.1111/j.1420-9101.2012.02610.x](https://doi.org/10.1111/j.1420-9101.2012.02610.x).
- [59] Malgorzata Zatyka and Christopher M. Thomas. “Control of genes for conjugative transfer of plasmids and other mobile elements”. In: *FEMS Microbiology Reviews* 21.4 (Feb. 1998), pp. 291–319. ISSN: 0168-6445. DOI: [10.1111/j.1574-6976.1998.tb00355.x](https://doi.org/10.1111/j.1574-6976.1998.tb00355.x). eprint: <https://academic.oup.com/femsre/article-pdf/21/4/291/18121383/21-4-291.pdf>.
- [60] María Getino and Fernando de la Cruz. “Natural and Artificial Strategies To Control the Conjugative Transmission of Plasmids”. In: *Microbiology Spectrum* 6.1 (2018).
- [61] Tatyana A. Sysoeva et al. “Growth-stage-dependent regulation of conjugation”. In: *AICHe Journal* 66.3 (Mar. 2020), pp. 1–10. ISSN: 0001-1541. DOI: [10.1002/aic.16848](https://doi.org/10.1002/aic.16848).
- [62] Gang Liu et al. “Antibiotic-Induced, Increased Conjugative Transfer Is Common to Diverse Naturally Occurring ESBL Plasmids in *Escherichia coli*”. eng. In: *Frontiers in microbiology* 10 (2019), pp. 2119–2119. ISSN: 1664-302X.
- [63] João Alves Gama, Rita Zilhão, and Francisco Dionisio. “Co-resident plasmids travel together”. In: *Plasmid* 93 (2017), pp. 24–29. ISSN: 0147-619X. DOI: <https://doi.org/10.1016/j.plasmid.2017.08.004>.
- [64] Francisco Dionisio, Rita Zilhão, and João Alves Gama. “Interactions between plasmids and other mobile genetic elements affect their transmission and persistence”. In: *Plasmid* 102.January (2019), pp. 29–36. ISSN: 10959890. DOI: [10.1016/j.plasmid.2019.01.003](https://doi.org/10.1016/j.plasmid.2019.01.003).
- [65] Katie E. Barry et al. “Don’t overlook the little guy: An evaluation of the frequency of small plasmids co-conjugating with larger carbapenemase gene containing plasmids”. In: *Plasmid* 103.December 2018 (2019), pp. 1–8. ISSN: 10959890. DOI: [10.1016/j.plasmid.2019.03.005](https://doi.org/10.1016/j.plasmid.2019.03.005).
- [66] Fabienne Benz et al. “Plasmid-and strain-specific factors drive variation in ESBL-plasmid spread in vitro and in vivo”. In: *The ISME journal* 15.3 (2021), pp. 862–878.
- [67] Diane E. Taylor, Jessie G. Levine, and David E. Bradley. “In vivo formation of a plasmid cointegrate expressing two incompatibility phenotypes”. In: *Plasmid* 5.3 (1981), pp. 233–244. ISSN: 0147-619X. DOI: [https://doi.org/10.1016/0147-619X\(81\)90001-9](https://doi.org/10.1016/0147-619X(81)90001-9).
- [68] Mark Achtman, N. Kennedy, and R. Skurray. “Cell-cell interactions in conjugating *Escherichia coli*: Role of traT protein in surface exclusion”. In: *Proceedings of the National Academy of Sciences of the United States of America* 74.11 (1977), pp. 5104–5108. ISSN: 00278424. DOI: [10.1073/pnas.74.11.5104](https://doi.org/10.1073/pnas.74.11.5104).
- [69] J. Haase et al. “Bacterial conjugation mediated by plasmid RP4: RSF1010 mobilization, donor-specific phage propagation, and pilus production require the same Tra2 core components of a proposed DNA transport complex.” In: *Journal of bacteriology* 177.16 (1995), pp. 4779–4791. ISSN: 0021-9193. DOI: [10.1128/JB.177.16.4779-4791.1995](https://doi.org/10.1128/JB.177.16.4779-4791.1995).
- [70] Neil Willetts and John Maule. “Interactions between the surface exclusion systems of some F-like plasmids”. In: *Genetical Research* 24.1 (Aug. 1974), pp. 81–89. ISSN: 0016-6723. DOI: [10.1017/S0016672300015093](https://doi.org/10.1017/S0016672300015093).
- [71] Jacqueline L Harrison et al. “Surface exclusion specificity of the TraT lipoprotein is determined by single alterations in a five-amino-acid region of the protein”. In: *Molecular Microbiology* 6.19 (1992), pp. 2825–2832. ISSN: 13652958. DOI: [10.1111/j.1365-2958.1992.tb01462.x](https://doi.org/10.1111/j.1365-2958.1992.tb01462.x).
- [72] Raul Fernandez-Lopez et al. “Comparative genomics of the conjugation region of F-like plasmids: Five shades of F”. In: *Frontiers in Molecular Biosciences* 3.NOV (2016). ISSN: 2296889X. DOI: [10.3389/fmolb.2016.00071](https://doi.org/10.3389/fmolb.2016.00071).



- [73] Cedric Szpirer et al. “Retrotransfer or gene capture: a feature of conjugative plasmids, with ecological and evolutionary significance”. In: *Microbiology* 145.12 (Dec. 1999), pp. 3321–3329. ISSN: 1350-0872. DOI: [10.1099/00221287-145-12-3321](https://doi.org/10.1099/00221287-145-12-3321).
- [74] J. E. Peters and S. A. Benson. “Redundant transfer of F’ plasmids occurs between *Escherichia coli* cells during nonlethal selections”. In: *Journal of Bacteriology* 177.3 (1995), pp. 847–850. ISSN: 00219193. DOI: [10.1128/jb.177.3.847-850.1995](https://doi.org/10.1128/jb.177.3.847-850.1995).
- [75] Rafael Pinilla-Redondo et al. “Type IV CRISPR–Cas systems are highly diverse and involved in competition between plasmids”. In: *Nucleic Acids Research* 48.4 (Feb. 2020), pp. 2000–2012. ISSN: 0305-1048. DOI: [10.1093/nar/gkz1197](https://doi.org/10.1093/nar/gkz1197).
- [76] Kira S. Makarova et al. “An updated evolutionary classification of CRISPR–Cas systems”. In: *Nature Reviews Microbiology* 13.11 (2015), pp. 722–736. ISSN: 17401534. DOI: [10.1038/nrmicro3569](https://doi.org/10.1038/nrmicro3569).
- [77] Pedro H. Oliveira, Marie Touchon, and Eduardo P.C. Rocha. “The interplay of restriction-modification systems with mobile genetic elements and their prokaryotic hosts”. In: *Nucleic Acids Research* 42.16 (2014), pp. 10618–10631. ISSN: 13624962. DOI: [10.1093/nar/gku734](https://doi.org/10.1093/nar/gku734).
- [78] Tatiana Dimitriu et al. “Bacteria from natural populations transfer plasmids mostly towards their kin”. In: *Proceedings of the Royal Society B: Biological Sciences* 286.1905 (2019). ISSN: 14712954. DOI: [10.1098/rspb.2019.1110](https://doi.org/10.1098/rspb.2019.1110).
- [79] Louise Roer, Frank M. Aarestrup, and Henrik Hasman. “The EcoKI type I restriction-modification system in *Escherichia coli* affects but is not an absolute barrier for conjugation”. In: *Journal of Bacteriology* 197.2 (2015), pp. 337–342. ISSN: 10985530. DOI: [10.1128/JB.02418-14](https://doi.org/10.1128/JB.02418-14).
- [80] Iwona Mruk and Ichizo Kobayashi. “To be or not to be: Regulation of restriction-modification systems and other toxin-antitoxin systems”. In: *Nucleic Acids Research* 42.1 (2014), pp. 70–86. ISSN: 03051048. DOI: [10.1093/nar/gkt711](https://doi.org/10.1093/nar/gkt711).
- [81] Burcu Tepekule et al. “Modeling antibiotic treatment in hospitals: A systematic approach shows benefits of combination therapy over cycling, mixing, and mono-drug therapies”. In: *PLoS Computational Biology* 13.9 (2017), pp. 1–22. ISSN: 15537358. DOI: [10.1371/journal.pcbi.1005745](https://doi.org/10.1371/journal.pcbi.1005745).
- [82] Pengxia Wang et al. “The resolution and regeneration of a cointegrate plasmid reveals a model for plasmid evolution mediated by conjugation and oriT site-specific recombination”. In: *Environmental Microbiology* 15.12 (2013), pp. 3305–3318. DOI: <https://doi.org/10.1111/1462-2920.12177>.
- [83] Sonja Lehtinen, Jana S. Huisman, and Sebastian Bonhoeffer. “Evolutionary mechanisms that determine which bacterial genes are carried on plasmids”. In: *bioRxiv* (2020).
- [84] Grace A Blackwell et al. “Exploring bacterial diversity via a curated and searchable snapshot of archived DNA sequences”. In: *bioRxiv* (2021).
- [85] Sergio Arredondo-Alonso et al. “On the (im) possibility of reconstructing plasmids from whole-genome short-read sequencing data”. In: *Microbial genomics* 3.10 (2017).
- [86] Ryan R Wick et al. “Recovery of small plasmid sequences via Oxford Nanopore sequencing”. In: *bioRxiv* (2021).

# Supplementary materials for *Plasmid co-infection: linking biological mechanisms to ecological and evolutionary dynamics*

Claudia Igler<sup>1</sup>, Jana S. Huisman<sup>1,2</sup>, Berit Siedentop<sup>1</sup>,  
Sebastian Bonhoeffer<sup>1</sup>, Sonja Lehtinen<sup>1\*</sup>

<sup>1</sup> Institute of Integrative Biology, Department of Environmental Systems Science, ETH Zürich, Zurich, Switzerland

<sup>2</sup> Swiss Institute of Bioinformatics, Lausanne, Switzerland

\* Corresponding author; Email: [sonja.lehtinen@env.ethz.ch](mailto:sonja.lehtinen@env.ethz.ch)

## <sup>1</sup> **1 Supplementary Methods and Results**

### <sup>2</sup> **1.1 Parameter table for simulations**

| Parameter                                                | Dimensions                                    | Value/Range for Figure 2 (with co-conjugation) | Value for Figure 3 (without co-conjugation) |
|----------------------------------------------------------|-----------------------------------------------|------------------------------------------------|---------------------------------------------|
| Cell replication rate $\rho_0$                           | time <sup>-1</sup>                            | 1                                              | 1                                           |
| Cell replication rate $\rho_i$ with $i \in \{A, B, AB\}$ | time <sup>-1</sup>                            | [0,1]                                          | 0.9                                         |
| Cell death rate $\gamma_i$                               | time <sup>-1</sup>                            | 0.1                                            | 0.1                                         |
| Carrying capacity $K$                                    | cells                                         | 1                                              | 1                                           |
| Conjugation rate $\beta_i$ with $i \in \{A, B\}$         | volume cells <sup>-1</sup> time <sup>-1</sup> | [0,1]                                          | 0.2                                         |
| Co-conjugation rate $\beta_{AB}$                         | volume cells <sup>-1</sup> time <sup>-1</sup> | $q_{AB}\beta_i$                                | 0                                           |
| Conjugation from co-infected cells $q_i$                 | probability                                   | $q_A = q_B = q_{AB} = 1/3$                     | $q_A = q_B = 1/2$                           |
| Susceptibility to co-infection $k_{i,j}$                 | probability                                   | [0,1]                                          | 1/2                                         |
| Susceptibility to displacement $k_{i,AB}$                | probability                                   | $k_{i,j}/2$                                    | 1/4                                         |
| Complete segregation loss $s_i$                          | probability                                   | 1/1000                                         | 1/1000                                      |
| Partial segregation loss $m_i$                           | probability                                   | [0,0.5]                                        | 1/3                                         |
| Co-infection through co-conjugation ( $g_i$ )            | probability                                   | 1/2                                            | -                                           |

Table S1: **Parameter dimensions and values or ranges used in simulations.** For these parameter values, the model is structurally neutral - i.e. the variants are ecologically indistinguishable (see Supplementary Text 3). Unless otherwise indicated, the values for  $A$ ,  $B$  and  $AB$  are the same in all simulations. The two columns represent parameters used in simulations with and without co-conjugation (i.e. simultaneous transfer of both plasmids from co-infected cells). Most simulations relating to frequency-dependent selection (e.g. Figures 3 and S2) use the parameter set without co-conjugation because the relationship with previous work on structural neutrality is clearer when  $\beta_{AB} = 0$ . Frequency-dependent selection with co-conjugation is explored in Figure S3. Co-infection through co-conjugation ( $g_i$ ) is not relevant when there is no co-conjugation, which is why the value is "-" in the third column.

## 3 1.2 Classification using linear discriminant analysis (LDA)

4 We explored the influence of various co-infection parameters by random parameter sampling  
5 and subsequent separation through linear discriminant analysis (LDA) for the population dy-  
6 namics of two identical plasmids, i.e. where all infection and co-infection parameters between  
7 the plasmids are the same. The only difference we assume between the plasmids is the starting  
8 frequency, which is higher for plasmid variant  $B$ . We use two different sets of initial conditions:  
9 either starting from an almost entirely susceptible population (94%  $P_0$ , 1%  $P_A$ , 5%  $P_B$ ) or start-  
10 ing from an almost entirely plasmid-carrying population (98%  $P_B$ , 1%  $P_A$ , 1%  $P_0$ ). (The results  
11 of the former are shown in the main text (Figure 2) and for the latter in Figure S1.)

12 First, we randomly sampled the parameter space (6100 samples) for the following parame-  
13 ters: plasmid transmission ( $\beta_i$ ), susceptibility to co-infection or displacement ( $k_{i,j}$ ,  $k_{i,AB}$ ), partial  
14 plasmid loss ( $m_i$ ) and plasmid cost (i.e. decreases in replication rate  $\rho_i$ ) using linear sampling  
15 between 0 and 1 or 0 and 0.5 (Table S1). We recorded the frequency of each subpopula-  
16 tion after 500 time steps (we also used 1000 time steps to ensure that our simulations had  
17 reached steady state and saw no difference in the outcome) and used these frequencies for  
18 classification of the outcome into 4 classes:

- 19 • 'no plasmid':  $P_0/(P_0 + P_A + P_B + P_{AB}) > 90\%$
- 20 • 'one plasmid':  $P_A/(P_A + P_B + P_{AB}) > 50\%$  or  $P_B/(P_A + P_B + P_{AB}) > 50\%$ , and all other  
21 populations  $< 20\%$

- 22 • 'high co-infection':  $P_{AB}(P_A + P_B + P_{AB}) > 50\%$ , and all other populations  $< 20\%$
- 23 • 'low co-infection':  $P_A$  and  $P_B$  each  $> 25\%$  and together  $> 50\%$ , and all other populations
- 24  $< 20\%$

25 This classification was used to identify the effect of each parameter on the population outcome  
 26 by applying linear discriminant analysis (LDA), which is a supervised method of dimensional-  
 27 ity reduction [1]. Specifically, LDA projects the simulation results on a 2D space so that the  
 28 centroids of the individual classes are maximally separated and the within-class scattering of  
 29 points is minimized. The magnitude and direction of the parameter arrows in this 2D-space  
 30 show their significance in separating specific classes.

31 The 'one plasmid' class is observed at a very low probability in our data set (Figure S1A):  
 32 we assume equal fitness for both plasmids and this class therefore reflects the influence of  
 33 initial conditions (i.e. occurs when the low initial frequency plasmid remains at low frequency).  
 34 Accordingly, there is significant overlap between the 'one plasmid' and 'low co-infection' class  
 35 (Figure S1B). This makes sense as the parameters explored here are mostly modifying co-  
 36 infection behavior and will not be instrumental in separating variations in singly infected states  
 37 (i.e.  $P_A$  and  $P_B$  frequencies). Hence, we are not showing the 'one plasmid' class for the LDA  
 38 in Figure 2, but the results are highly similar to the ones shown in Figure S1A, B.)

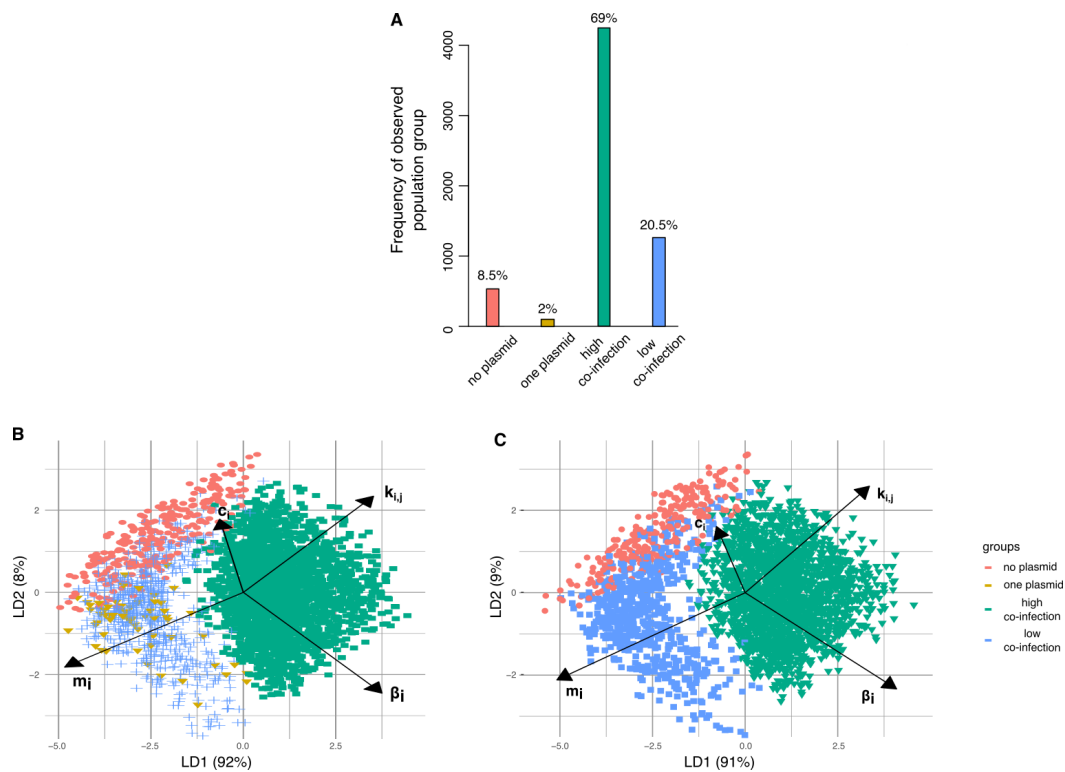

Figure S1: **LDA performed on different initial conditions.** **A.** Probability of each class over all simulation outcomes. Frequencies of each class - 'no plasmid' (red), 'one plasmid' (yellow), 'high co-infection' (green) or 'low co-infection' (blue) - are given for 6100 randomly sampled parameter sets ( $m_i, k_{i,j} = 2k_{i,AB}, \beta_i, c_i$ ) at the end of 500 time steps. **B.** LDA using all 4 classes shown in A (using the same color scheme). Arrows show the magnitude and direction of the parameters varied. The survival of only one plasmid cannot be well separated from the other classes with these parameters. **C.** LDA without the 'one plasmid' class. Parameters  $m_i$  and  $k_{i,j}$  ( $k_{i,AB}$ ) are most important in defining separability of plasmid co-existence due to co-infection or singly infected cells.

### 39 1.3 Parameter values and frequency-dependent selection

40 Figures S2 and S3 show how deviation from the parameter values in Table S1 introduces  
 41 frequency-dependent selection, for a certain subset of parameters. Specifically, the variants  
 42 are under NFDS (i.e. co-infection is beneficial) when:

- 43 • co-infected cells have a higher replication rate than the singly infected state ( $\rho_{AB} > \rho_A$ ,
- 44 or, equivalently,  $\rho_{AB} > \rho_B$ );
- 45 • co-infected cells have a lower death rate ( $\gamma_{AB} < \gamma_A$ );
- 46 • co-infected cells have a lower probability of plasmid loss ( $s_{AB} < s_A$ );
- 47 • the overall rate of plasmid transmission from co-infected cells is higher ( $q_A \beta_A + \frac{\beta_{AB}}{2} >$
- 48  $\beta_A/2$ );
- 49 • co-conjugation to a singly infected cell has a higher probability of resulting in co-infection
- 50 than expected ( $g_A > \frac{1}{2}$ );
- 51 • if a plasmid in  $P_{AB}$  is less susceptible to further infection by the competing variant ( $k_{B,AB} <$
- 52  $\frac{k_{B,A}}{2}$ ).

53 Reversing these inequalities makes the co-infected state detrimental and leads to PFDS. Changes  
 54 in other parameters ( $\beta_i, m_i, k_{i,j}$ ) do not introduce frequency-dependent effects (see Section 3  
 55 for mathematical derivation).

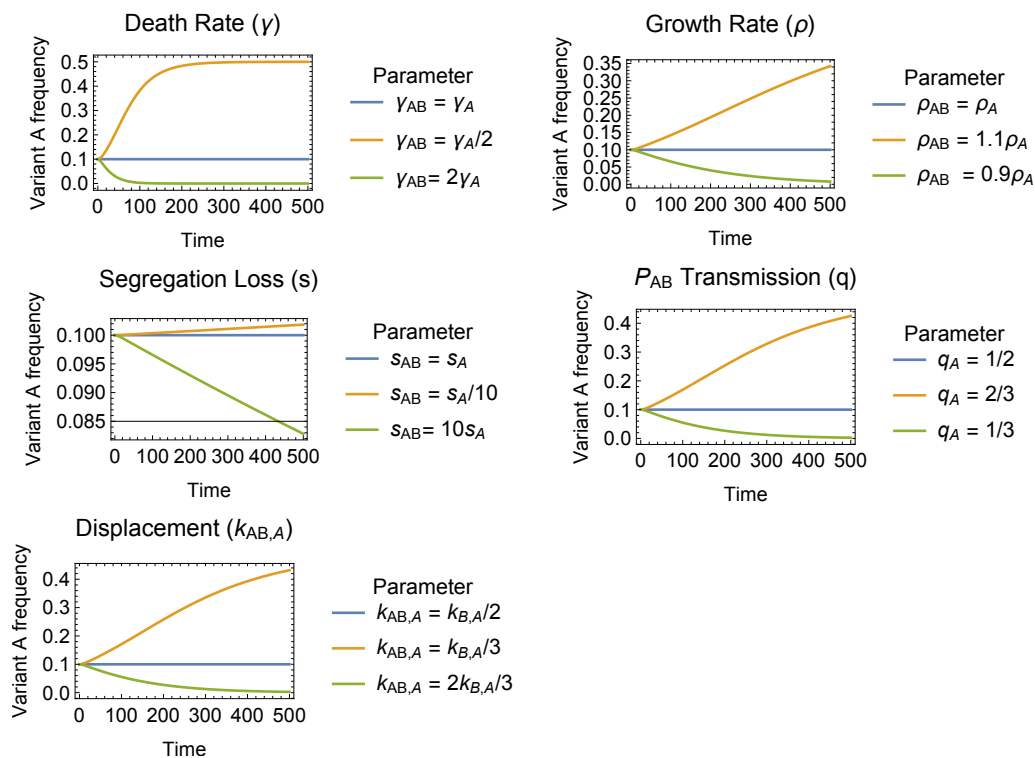

Figure S2: **The impact of model parameters on frequency-dependent effects in a model without co-conjugation** ( $\beta_{AB} = 0$ ) Each plot shows the effect of varying a single parameter. For all plots, the properties of both plasmid variants are always identical. Standard parameter values are as follows:  $\rho_0 = 1$ ,  $\rho_A = \rho_B = \rho_{AB} = 0.9$ ,  $\gamma_i = 0.1$ ,  $\beta_A = \beta_B = 0.2$ ,  $\beta_{AB} = 0$ ,  $m_i = 1/3$ ,  $q_i = 1/2$ ,  $s_i = 1/1000$ ,  $k_{A,B} = k_{B,A} = 1/2$ ,  $k_{A,AB} = k_{B,AB} = 1/4$ .

## 56 1.4 Asymmetric co-infection effects

57 Figure S4 shows the impact that asymmetric co-infection effects (specifically, partial segrega-  
 58 tion loss,  $m_i$ , and horizontal transmissibility from co-infected cells,  $q_i$ ) have on model outcomes.  
 59 These asymmetries do not in themselves introduce frequency-dependent selection, although  
 60 with horizontal transmissibility ( $q_i$ ), frequency-dependent effects arise from changes in the over-  
 61 all conjugation rate from co-infected cells.

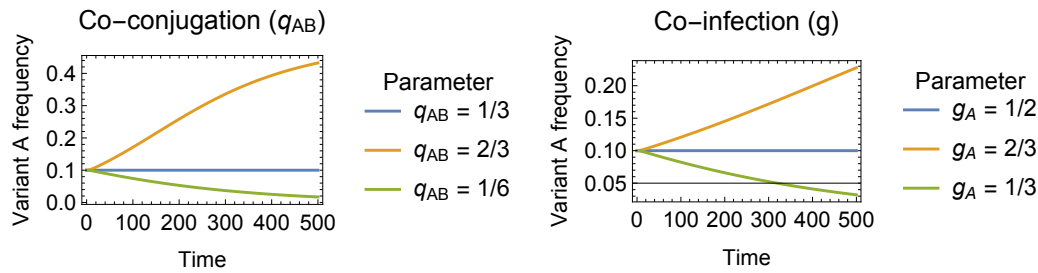

**Figure S3: The impact of parameters relating to co-conjugation on frequency-dependent effects.** For this plot, we have allowed co-conjugation ( $\beta_{AB} = q_{AB}\beta_A = q_{AB}\beta_B$ ) and reduced the  $q$  parameters ( $q_A = q_B = q_{AB} = 1/3$ ). Each panel explores the effect of parameters relating to co-conjugation. The properties of both plasmid variants are always identical. Other default parameter values are:  $\rho_0 = 1$ ,  $\rho_A = \rho_B = \rho_{AB} = 0.9$ ,  $\gamma = 0.1$ ,  $\beta_A = \beta_B$ ,  $m_i = 1/3$ ,  $s_i = 1/1000$ ,  $k_{A,B} = k_{B,A} = 1/2$ ,  $k_{A,AB} = k_{B,AB} = 1/4$ ,  $g = 1/2$ .

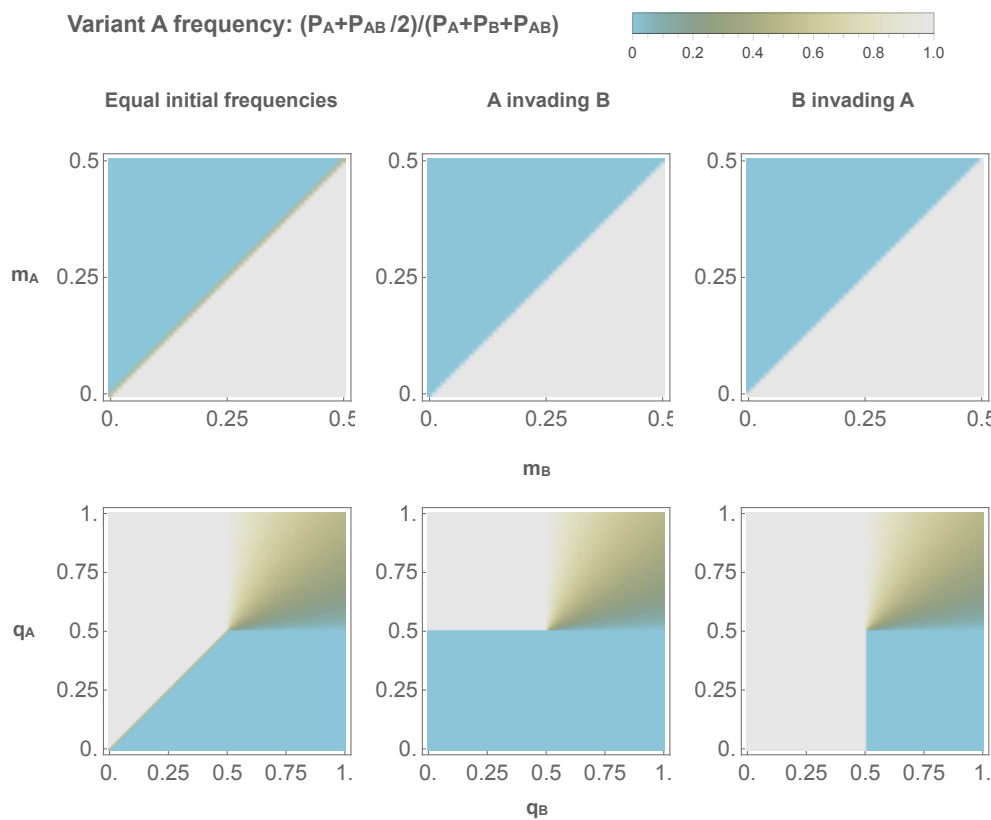

**Figure S4: The effect of asymmetric co-infection interactions on frequency-dependent selection.** The colour in each plot indicates the equilibrium frequency of variant  $A$ . The columns indicate different initial plasmid variant frequencies. Top row: the effect of asymmetric probability of vertical transmission for co-infecting plasmids ( $m_i$  indicates the probability that plasmid variant  $i$  is lost during replication). No frequency-dependent effects are observed. Bottom row: the effect of an asymmetric probability of horizontal transmission for co-infecting plasmids ( $q_i$  indicates the probability that variant  $i$  is transmitted during conjugation by co-infected cells). Frequency-dependent effects do not arise when the overall transmissibility of the co-infected cell is the same as of singly infected cells: when  $q_A + q_B = 1$ , (i.e. the main diagonal of each plot), the fitter variant (i.e. with higher  $q_i$ ) always out-competes the other, regardless of initial conditions. For all plots, standard parameter values are as follows:  $\rho_0 = 1$ ,  $\rho_A = \rho_B = \rho_{AB} = 0.9$ ,  $\gamma_i = 0.1$ ,  $\beta_A = \beta_B = 0.2$ ,  $\beta_{AB} = 0$ ,  $m_i = 1/3$ ,  $q_i = 1/2$ ,  $s_i = 1/1000$ ,  $k_{A,B} = k_{B,A} = 1/2$ ,  $k_{A,AB} = k_{B,AB} = 1/4$

## 62 **2 Considerations around model structure**

63 Here, we develop some ideas relating to model structure in more depth.

### 64 **2.1 The nature of co-infection**

65 In drawing parallels between infectious disease and plasmid dynamics, it is worth making a  
66 distinction between two fundamentally different forms of co-infection (Figure S5A). In the first  
67 form of co-infection, hosts contain multiple ‘patches’: in singly infected hosts, a single patch  
68 is occupied, and co-infection occurs through additional patches becoming occupied. In this  
69 form of co-infection, a host can be multiply infected with the same variant, and this state is  
70 ecologically different from single infection with that variant. This type of co-infection can be  
71 appropriate for epidemiological models – e.g. when co-infection represents infection of multiple  
72 body sites – but it is difficult to see a biological correspondence of different within-cell patches  
73 in plasmid infection.

74 In the second form of co-infection, which is appropriate for modelling plasmid co-infection, hosts  
75 consist of a single patch, which can be occupied by one or more variants. In this single patch  
76 form of co-infection, multiple infection with the same variant is indistinguishable from single  
77 infection with that variant. Cells which are multiply infected with different variants may have  
78 different properties from singly infected cells, such as higher overall within-host copy number,  
79 for example. The key distinction is that this difference arises from the properties of co-infecting  
80 variants—e.g. through dependence on different within-host resources—and is not an inherent  
81 property of the host cells. This distinction is relevant when relating our results to the concept of  
82 structural neutrality in epidemiological models (SI Section 3). [2].

### 83 **2.2 Implicit modelling of plasmid copy number**

84 The type of model we discuss does not explicitly track plasmid copy number (Figure S5B): for  
85 example, the entire  $P_A$  population is approximated by a single cell type representing the aver-  
86 age copy number, ignoring stochastic copy number variation as well as copy number dynamics  
87 during the cell cycle and following initial infection. In general, this is likely to be a reasonable ap-  
88 proximation as copy number adjustments are generally very fast, with plasmid number doubling  
89 times of 5-10 minutes [3]. In models of plasmid co-infection, this approximation also means that  
90 we do not explicitly model within-cell variant frequencies. The co-infected state represents the  
91 average co-infected state, i.e. average within-cell variant frequencies. If the average within-cell  
92 variant frequencies are expected to be equal (i.e. 50/50 on average), copy number dependent  
93 parameters (e.g.  $k_{i,AB}$ ,  $m_i$ ,  $q_i$ ) would also be equal for both variants (in absence of other copy  
94 number independent effects that could introduce a difference in these parameters). Unequal  
95 average within-cell frequencies can be expressed by adjusting copy number dependent param-  
96 eters to reflect the greater copy number of one variant. Here, it is important to be explicit about  
97 the assumed relationship between copy number and parameter value. Overall, although the  
98 implicit modelling of copy number does not necessarily affect evolutionary outcomes, it makes  
99 the relationship between biological processes and model parameters less intuitive.

### 100 **2.3 Cell population growth and resource competition**

101 We have modelled net cell population growth as consisting of both a density-dependent and  
102 density-independent component. It is worth highlighting that growth can also be modelled with-  
103 out inclusion of a density-independent element, i.e. with a single term relating net population  
104 growth to the carrying capacity  $K$ . Both versions of the model lead to a bounded total popu-  
105 lation size. The essential difference is that, without the density-independent term, cells neither  
106 replicate nor die once carrying capacity is reached. In this version of the model, therefore,  
107 the effect of plasmid carriage on host cell fitness ceases to matter once carrying capacity is  
108 reached. In terms of evolutionary outcomes, the two types of model will place a different em-  
109 phasis on horizontal and vertical effects. In cases where the fitness difference between plasmid  
110 variants arises solely through effects on the host cell fitness (e.g. competition between variant  
111 with and without a specific cargo gene, such as antibiotic resistance), this difference is sub-  
112 stantial: a model without a density-independent growth term will generally allow coexistence  
113 of the variants at equilibrium, if carrying capacity is reached before one of the variants has  
114 out-competed the other.

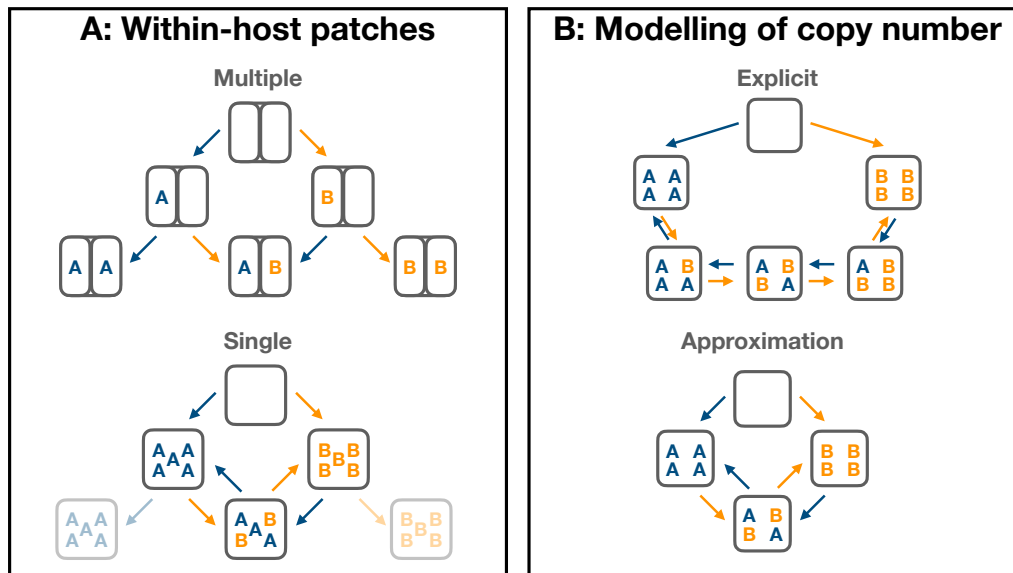

Figure S5: **Illustration of two concepts central to modelling plasmid co-infection. A** Co-infection with and without within-host patches. In the top diagram, hosts consist of multiple patches, and co-infection occurs when more than one patch is occupied. In the bottom diagram, hosts consist of a single patch and co-infection occurs when this patch is shared by multiple variants. An important difference between the two types of co-infection is that co-infection with the same variant is not biologically meaningful in the single patch model (illustrated as transparent states in the lower panel). **B** Explicit and implicit modelling of copy number. The top diagram illustrates what a model explicitly representing within-host variant frequencies might look like. The bottom diagram shows how this explicit model is approximated.

### 115 3 Co-infection and frequency-dependent selection

116 Here, we discuss the relationship between co-infection and frequency-dependent selection in  
 117 more depth and consider this result in relation to Lipsitch et al. [2], which motivated much  
 118 of our approach. Specifically, we discuss the concept of structural neutrality in greater depth;  
 119 use this approach to derive which parameters lead to frequency-dependent effects; and ex-  
 120 pand on the interpretation of these effects in terms of beneficial and detrimental effects of  
 121 co-infection.

#### 122 3.1 Structural neutrality

123 Work on epidemiological models of co-infection has shown that seemingly innocuous modelling  
 124 choices can introduce unintended ecological differences between strains, which can act to pro-  
 125 mote strain diversity ('co-existence for free') [2]. To ensure that model outcomes reflect the  
 126 intended ecological properties of strains, rather than unintended differences arising by model  
 127 structure, Lipsitch et al. introduced the concept of a structurally neutral null model. Such null  
 128 models satisfy criteria (discussed below) which ensure they do not contain unintended eco-  
 129 logical interactions and can thus serve as a starting point for introducing intended differences.  
 130 For example, consider a model of competition between an antibiotic resistant and an antibiotic  
 131 susceptible strain: the intended differences between the strains would arise from the effect of  
 132 antibiotics and a potential fitness cost of resistance. Thus, in absence of antibiotic pressure and  
 133 with no resistance-associated fitness cost, the two strains are ecologically indistinguishable and  
 134 the model structure should reflect this.

135 Lipsitch et al. define structural neutrality in a model of indistinguishable strains (i.e. strains, or in  
 136 our case plasmids, differing only in a neutral marker) in terms of two criteria. Firstly, 'ecological  
 137 neutrality': if the strains are indeed indistinguishable, they should have identical ecological  
 138 interactions, i.e. there should be nothing distinguishing the interactions that strain *A* has with  
 139 itself, from the interactions that strain *A* has with strain *B*. For this criterion to hold, it should  
 140 be possible to write the dynamics of the number of strains a host is infected with (referred to  
 141 as 'ecological variables' in Lipsitch et al.), without reference to particular strain identities. For



142 example, in our case, the ecological variables would be defined by the number of plasmids  
 143 variants in the host cell, i.e.  $P_0$ ,  $P_1$  (where  $P_1 = P_A + P_B$ ), and  $P_2$  (where  $P_2 = P_{AB}$ ). For  
 144 the ecological neutrality criterion hold, it should be possible to write the equations for these  
 145 ecological variables without making reference to  $P_A$  and  $P_B$ . The intuition behind this criterion  
 146 is that, because  $A$  and  $B$  are indistinguishable, the dynamics of  $P_0$ ,  $P_1$  and  $P_2$  should not  
 147 depend on how  $P_A$  and  $P_B$  make up the  $P_1$  class.

148 The second criterion is ‘population genetic neutrality’: there should be no single equilibrium  
 149 strain frequency, instead, any arbitrary equilibrium strain frequency should be reachable by  
 150 choosing the right initial conditions. The intuition for this criterion is that, with two indistinguish-  
 151 able strains, there should be no mechanism that acts to equilibrate strain frequencies. Lipsitch  
 152 et al. show that models which can be written in a specific form (‘ancestor-tracing’, see Lipsitch  
 153 et al.) that fulfills the ecological neutrality criterion also fulfill the population genetic one.

### 154 3.2 Relationship between our results and structural neutrality

155 Our results are closely related to the concept of structural neutrality: for parameter values  
 156 at which the co-infected state is neither beneficial nor detrimental for the plasmid variants,  
 157 the model is neutral. Figure 3A and Supplementary Figures S2 and S3 illustrate population  
 158 genetic neutrality: this is equivalent to the absence of positive or negative frequency-dependent  
 159 selection.

160 As written, the model does not directly fulfill the ecological neutrality criterion: the dynamics of  
 161  $P_1$  are not independent of variant identities (i.e. the equation for  $\frac{dP_1}{dt} = \frac{dP_A}{dt} + \frac{dP_B}{dt}$  cannot be  
 162 written just in terms of the ecological variables  $P_0$ ,  $P_1$  and  $P_2$ , but remains dependent on  $P_A$   
 163 and  $P_B$ ). However, it is possible to re-formulate the model in a mathematically equivalent form,  
 164 at least when  $\beta_{AB} = 0$ , which does fulfill the ecological neutrality criterion (as demonstrated  
 165 in Lipsitch et al. [2]). To achieve this, we need to introduce two additional states, where a  
 166 host is dually infected with the same variant ( $P_{AA}$  and  $P_{BB}$ ). As discussed in Supplementary  
 167 Text 2.1, if the host consists of a single patch, these states are not biologically meaningful.  
 168 However, we can introduce them as a mathematical convenience to produce a model which  
 169 does fulfill the ecological neutrality criterion (see Lipsitch et al. for an ecological interpretation  
 170 of this alternative formulation). Switching to  $N$  to denote cell densities in order to facilitates  
 171 comparison between the two formulations, we consider a model of the form:

$$\begin{aligned}
 \frac{dN_0}{dt} &= N_0 \left[ \rho_0 \left(1 - \frac{T}{K}\right) - \gamma_0 - \lambda'_A - \lambda'_B \right] \\
 &\quad + \left(1 - \frac{T}{K}\right) [\rho_{ASA} N_A + \rho_{BSB} N_B + \rho_{ABSAB} N_{AB} + \rho_{AASAA} N_{AA} + \rho_{BBSBB} N_{BB}] \\
 \frac{dN_A}{dt} &= N_A \left[ \rho_A \left(1 - s_A\right) \left(1 - \frac{T}{K}\right) - \gamma_A - k_{B,A} \lambda'_B - k_{A,A} \lambda'_A \right] + \lambda'_A N_0 \\
 &\quad + m_B \rho_{AB} \left(1 - s_{AB}\right) \left(1 - \frac{T}{K}\right) N_{AB} + 2m_A \rho_{BB} \left(1 - s_{AA}\right) \left(1 - \frac{T}{K}\right) N_{AA} \\
 \frac{dN_B}{dt} &= N_B \left[ \rho_B \left(1 - s_B\right) \left(1 - \frac{T}{K}\right) - \gamma_B - k_{A,B} \lambda'_A - k_{B,B} \lambda'_B \right] + \lambda'_B N_0 \\
 &\quad + m_A \rho_{AB} \left(1 - s_{AB}\right) \left(1 - \frac{T}{K}\right) N_{AB} + 2m_B \rho_{BB} \left(1 - s_{BB}\right) \left(1 - \frac{T}{K}\right) N_{BB} \\
 \frac{dN_{AB}}{dt} &= N_{AB} \left[ \rho_{AB} \left(1 - s_{AB}\right) \left(1 - m_A - m_B\right) \left(1 - \frac{T}{K}\right) - \gamma_{AB} - k_{A,AB} \lambda'_A - k_{B,AB} \lambda'_B \right] \\
 &\quad + k_{B,A} \lambda'_B N_A + k_{A,B} \lambda'_A N_B + k_{A,BB} \lambda'_A N_{BB} + k_{B,AA} \lambda'_B N_{AA} \\
 \frac{dN_{AA}}{dt} &= N_{AA} \left[ \rho_{AA} \left(1 - s_{AA}\right) \left(1 - m_A - m_B\right) \left(1 - \frac{T}{K}\right) - \gamma_{AA} - k_{B,AA} \lambda'_B \right] + k_{A,A} \lambda'_A N_A + k_{A,AB} \lambda'_A N_{AB} \\
 \frac{dN_{BB}}{dt} &= N_{BB} \left[ \rho_{BB} \left(1 - s_{BB}\right) \left(1 - m_B - m_A\right) \left(1 - \frac{T}{K}\right) - \gamma_{BB} - k_{A,BB} \lambda'_A \right] + k_{B,B} \lambda'_B N_B + k_{B,AB} \lambda'_B N_{AB}
 \end{aligned}
 \tag{1}$$

172

173 Here,  $\lambda'_A = \beta_A (N_A + qN_{AB} + 2qN_{AA})$  and  $\lambda'_B = \beta_B (N_B + qN_{AB} + 2qN_{BB})$ . With  $P_A = N_A + N_{AA}$   
 174 and  $P_B = N_B + N_{BB}$ , this model is identical to the main text model (Equations 1, assuming  
 175  $\beta_{AB} = 0$ ) when:

- 176 •  $q = 1/2$

- 177 •  $k_{A,B} = k_{A,BB} = 2k_{A,AB}$  and  $k_{B,A} = k_{B,AA} = 2k_{B,AB}$
- 178 •  $\rho_A = \rho_{AA}$  and  $\rho_B = \rho_{BB}$
- 179 •  $\gamma_A = \gamma_{AA}$  and  $\gamma_B = \gamma_{BB}$
- 180 •  $s_A = s_{AA}$  and  $s_B = s_{BB}$

181 Most of these criteria are straightforwardly interpretable: the two model formulations are equiv-  
182 alent when the  $N_{ii}$  state is identical to the  $N_i$  state. The intuitive explanation for the criteria  
183 relating to the  $k$  parameters is discussed below.

184 In addition, this model fulfills the ecological neutrality criterion (i.e. the dynamics of the eco-  
185 logical variables  $N_0$ ,  $N_1 = N_A + N_B$  and  $N_2 = N_{AA} + N_{BB} + N_{AB}$  can be written without  
186 reference to the specific variant identities) when all parameters are identical for plasmid  $A$  and  
187  $B$  and:

- 188 •  $\rho_{AB} = \rho_{AA} = \rho_{BB}$
- 189 •  $\gamma_{AB} = \gamma_{AA} = \gamma_{BB}$
- 190 •  $s_{AB} = s_{AA} = s_{BB}$

191 These criteria are straightforwardly interpretable as the  $N_{AB}$  state being equivalent to the  $N_{AA}$   
192 and  $N_{BB}$  (and hence  $N_A$  and  $N_B$ ) states. Thus, when both sets of criteria hold, the co-infected  
193 state is equivalent to the singly infected state, and the model is structurally neutral. Thus,  
194 this reasoning recovers the results from Supplementary Figure S2 and the interpretation of  
195 neutrality arising from the co-infected state being neither beneficial nor detrimental. Note that  
196 these criteria do not include any specific constraints on  $k_{A,B}$  and  $k_{B,A}$  (other than in relation to  
197  $k_{A,AB}$  and  $k_{B,AB}$ ) or  $m_A$  and  $m_B$ .

198 In a model which includes co-conjugation ( $\beta_{AB} > 0$ ), the re-formulation to demonstrate struc-  
199 tural neutrality is more cumbersome and beyond the scope of this paper. However, intuitively  
200 (and as verified by simulation in Supplementary Figure S3) the co-infected state is equivalent  
201 to the singly infected state (and the model is neutral) when:

- 202 • the overall infectiousness of the two state is the same:  $2q\beta_A + \beta_{AB} = \beta_A$  (and similarly  
203 for  $B$ )
- 204 • co-conjugation leads to co-infection half as often as single conjugation (see below for  
205 further explanation):  $g_A = g_B = 1/2$ .

206 Finally, a small technical note: Lipsitch et al. consider ‘closed’ transmission models specifically,  
207 where all infected individuals were either infected at time 0 or result from horizontal transmis-  
208 sion. Technically, our model of plasmid transmission, and models of plasmid dynamics more  
209 generally, do not fall into this category because these models also allow infected cells to arise  
210 through replication of infected cells (i.e. vertical transmission). However, the results in Lipsitch  
211 et al. are nevertheless applicable to these models as well: the reasoning in Lipsitch et al.  
212 requires models to be closed to ensure that all strains present in the system had an ‘ancest-  
213 or’ present at time 0 (as opposed to coming into the system through migration, for example).  
214 This ancestry criterion holds for models allowing for vertical transmission, as each infected cell  
215 remains traceable to an ancestor infection.

### 216 3.3 Interpreting the impact of co-infection

217 The section above develops a mathematical explanation for why changes in specific parameters  
218 lead to frequency-dependent effects. In this section, we elaborate on the biological explanation,  
219 i.e. which biological processes make the co-infected state beneficial or detrimental to the co-  
220 infecting plasmids. For most parameters (Supplementary Text 1.3), the effect of the co-infected  
221 state is intuitive: for example, the co-infected state is clearly beneficial for co-infecting plasmids  
222 if co-infected cells have a lower death rate; a lower probability of overall plasmid loss; or higher  
223 overall conjugation rate than singly infected cells.

224 The results regarding susceptibility to co-infection and displacement (i.e. co-infection is bene-  
225 ficial when  $k_{i,AB} < \frac{k_{i,j}}{2}$  and  $g_i > \frac{1}{2}$ ) are perhaps a little less intuitive. For the susceptibility to  
226 displacement ( $k_{i,AB}$ ) it is helpful to consider a plasmid of copy number two. When establishing  
227 co-infection ( $P_A \rightarrow P_{AB}$ ), the incoming plasmid  $B$  can replace either of the copies of plasmid

228  $A$ , whereas displacement ( $P_{AB} \rightarrow P_B$ ) only occurs if the incoming plasmid  $B$  replaces the  
 229  $A$  variant. The reasoning is a little more complex for higher copy number plasmids because  
 230 conjugation can act to change within-host frequencies, rather than entirely replace one plas-  
 231 mid variant. The fundamental intuition, however, remains the same: in a co-infected cell with  
 232 average within-host variant frequency  $1/2$ , displacement must occur, on average, half as often  
 233 as co-infection. A similar argument also applies to explaining  $g_A > \frac{1}{2}$  (i.e. the probability of  
 234 co-conjugation to a singly infected cell resulting in co-infection).

## 235 4 Supplementary Figures

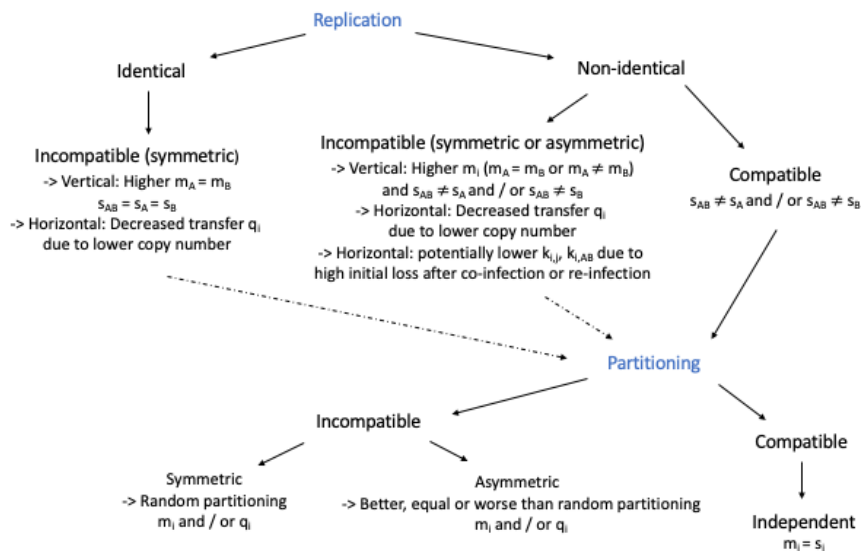

Figure S6: **Impact of replication and partitioning on co-infection parameters.** Summary of the potential effects of replication and partitioning system relatedness on co-infection modelling parameters as explained in main text section 3.

## 236 5 Supplementary Tables

Table S2: Transmission and fitness effects of biological mechanisms underlying co-infection processes and their empirical values. Here we discuss only direct effects, but all effects on host cell fitness and hence, growth, will affect vertical plasmid transmission indirectly. Similarly, effects from vertical transmission will indirectly affect horizontal transmission through the number of available plasmid donors.

| Biological mechanisms               | Effect on vertical plasmid transmission                                                                         | Effect on horizontal plasmid transmission | Effect on host cell                                                                                             | Empirical values                                                                            |
|-------------------------------------|-----------------------------------------------------------------------------------------------------------------|-------------------------------------------|-----------------------------------------------------------------------------------------------------------------|---------------------------------------------------------------------------------------------|
| Crosstalk in replication regulation | Random replication leads to higher variation in copy number and higher segregation loss of one or both plasmids | None directly                             | Potentially lower cost through down-regulation of plasmid replication (less than double the replication burden) | 1-15% [4] and 16-22% [5] segregation loss probability per generation for identical plasmids |

Continued on next page

Table S2 – Continued from previous page

| Biological mechanisms                                                   | Effect on vertical plasmid transmission                                                  | Effect on horizontal plasmid transmission                                          | Effect on host cell fitness                                                                     | Empirical values                                                                                                                                                                                                |
|-------------------------------------------------------------------------|------------------------------------------------------------------------------------------|------------------------------------------------------------------------------------|-------------------------------------------------------------------------------------------------|-----------------------------------------------------------------------------------------------------------------------------------------------------------------------------------------------------------------|
| Crosstalk in partitioning components                                    | Higher segregation loss                                                                  | None directly                                                                      | None directly                                                                                   | up to 3% [6]; 5% [7] loss probability per generation                                                                                                                                                            |
| Stochasticity in plasmid inheritance                                    | Segregation loss                                                                         | None directly                                                                      | None directly                                                                                   | $10^{-3} - 10^{-6} h^{-1}$ [8]; $10^{-3} - 10^{-8} h^{-1}$ [9]; $< 10^{-5}$ for high copy number plasmids [10]; 1-5% of cells in a growing population are empty [11]                                            |
| TA-induced stabilization                                                | Promotes TA-carrying plasmid maintenance and affects non-TA-carrying plasmid inheritance | None directly                                                                      | Metabolic (potentially temporary) inhibition of plasmid-free cells or TA-plasmid carrying cells | 2.5-100 fold stability increase (single infection) [12]; up to 63% loss of initially resident plasmid in 25 generations of co-infection [13]; more than 95% loss of co-resident plasmid in 100 generations [14] |
| Epistasis in plasmid costs                                              | Unclear; depends on the underlying mechanism                                             | Unclear; depends on the underlying mechanism                                       | Reduction of plasmid burden                                                                     | Relative fitness in pairwise competition with the wildtype: 0.87 and 0.99 for singly infected and 0.88 for co-infected cells [15]                                                                               |
| Fertility inhibition systems                                            | None directly                                                                            | Inhibition of (self and/or co-resident) plasmid transfer                           | Reduction of plasmid burden through inhibition of conjugation                                   | 100-10,000-fold reduction in conjugation [16]                                                                                                                                                                   |
| Co-integrates of different plasmid backbones                            | Unclear                                                                                  | Higher co-transfer and less single transfer; Higher or lower conjugation frequency | Unclear                                                                                         | Average conjugation frequency (i.e. tranconjugants per donor) of single plasmids $8.0 \times 10^{-4}$ and $2.1 \times 10^{-4}$ and co-integrate $3.5 \times 10^{-3}$ in broth [17]                              |
| Synchronized de-repression of conjugation machinery during co-infection | None directly                                                                            | Co-transfer of co-resident plasmids                                                | Unclear                                                                                         | Co-transfer is limited by the plasmid with the lower conjugation rate [18]                                                                                                                                      |

## References

237  
238  
239  
240  
241  
242  
243  
244

- [1] Burcu Tepekule et al. "Modeling antibiotic treatment in hospitals: A systematic approach shows benefits of combination therapy over cycling, mixing, and mono-drug therapies". In: *PLoS Computational Biology* 13.9 (2017), pp. 1–22. ISSN: 15537358. DOI: [10.1371/journal.pcbi.1005745](https://doi.org/10.1371/journal.pcbi.1005745).
- [2] Marc Lipsitch et al. "No coexistence for free: Neutral null models for multistrain pathogens". In: *Epidemics* 1.1 (2009), pp. 2–13. ISSN: 17554365. DOI: [10.1016/j.epidem.2008.07.001](https://doi.org/10.1016/j.epidem.2008.07.001). URL: <http://dx.doi.org/10.1016/j.epidem.2008.07.001>.

- 245 [3] Sarah K. Highlander and Richard P. Novick. "Plasmid repopulation kinetics in *Staphylo-*  
246 *coccus aureus*". In: *Plasmid* 17.3 (1987), pp. 210–221. ISSN: 10959890. DOI: [10.1016/  
247 0147-619X\(87\)90029-1](https://doi.org/10.1016/0147-619X(87)90029-1).
- 248 [4] Kazushige Ishii, Tamotsu Hashimoto-Gotoh, and Kenichi Matsubara. "Random replica-  
249 tion and random assortment model for plasmid incompatibility in bacteria". In: *Plasmid*  
250 1.4 (Sept. 1978), pp. 435–445. ISSN: 0147619X. DOI: [10.1016/0147-619X\(78\)90002-1](https://doi.org/10.1016/0147-619X(78)90002-1).  
251 URL: <https://linkinghub.elsevier.com/retrieve/pii/0147619X78900021>.
- 252 [5] Kurt Nordström, Søren Molin, and Helle Aagaard-Hansen. "Partitioning of plasmid R1  
253 in *Escherichia coli*: II. Incompatibility properties of the partitioning system". In: *Topics*  
254 *in Catalysis* 4.3 (1980), pp. 332–349. ISSN: 0147619X. DOI: [10.1016/0147-619X\(80\)  
255 90071-2](https://doi.org/10.1016/0147-619X(80)90071-2).
- 256 [6] M. Lemonnier et al. "Disruption of the F plasmid partition complex in vivo by partition  
257 protein SopA". In: *Molecular Microbiology* 38.3 (2000), pp. 493–503. ISSN: 0950382X.  
258 DOI: [10.1046/j.1365-2958.2000.02101.x](https://doi.org/10.1046/j.1365-2958.2000.02101.x).
- 259 [7] Edel M. Hyland, Edward W.J. Wallace, and Andrew W. Murray. "A model for the evolution  
260 of biological specificity: A cross-reacting DNA-binding protein causes plasmid incompat-  
261 ibility". In: *Journal of Bacteriology* 196.16 (2014), pp. 3002–3011. ISSN: 10985530. DOI:  
262 [10.1128/JB.01811-14](https://doi.org/10.1128/JB.01811-14).
- 263 [8] Billy T.C. Lau, Per Malkus, and Johan Paulsson. "New quantitative methods for measuring  
264 plasmid loss rates reveal unexpected stability". In: *Plasmid* 70.3 (2013), pp. 353–361.  
265 ISSN: 0147619X. DOI: [10.1016/j.plasmid.2013.07.007](https://doi.org/10.1016/j.plasmid.2013.07.007). URL: [http://dx.doi.org/10.  
266 1016/j.plasmid.2013.07.007](http://dx.doi.org/10.1016/j.plasmid.2013.07.007).
- 267 [9] Wesley Loftie-Eaton et al. "Compensatory mutations improve general permissiveness to  
268 antibiotic resistance plasmids". In: *Nature Ecology and Evolution* 1.9 (2017), pp. 1354–  
269 1363. ISSN: 2397334X. DOI: [10.1038/s41559-017-0243-2](https://doi.org/10.1038/s41559-017-0243-2). URL: [http://dx.doi.org/  
270 10.1038/s41559-017-0243-2](http://dx.doi.org/10.1038/s41559-017-0243-2).
- 271 [10] David K. Summers and David J. Sherratt. "Multimerization of high copy number plasmids  
272 causes instability: Cole 1 encodes a determinant essential for plasmid monomerization  
273 and stability". In: *Cell* 36.4 (Apr. 1984), pp. 1097–1103. ISSN: 00928674. DOI: [10.1016/  
274 0092-8674\(84\)90060-6](https://doi.org/10.1016/0092-8674(84)90060-6). URL: [https://linkinghub.elsevier.com/retrieve/pii/  
275 0092867484900606](https://linkinghub.elsevier.com/retrieve/pii/0092867484900606).
- 276 [11] Bin Shao et al. "Single-cell measurement of plasmid copy number and promoter activity".  
277 In: *Nature Communications* 12.1 (Dec. 2021), p. 1475. ISSN: 2041-1723. DOI: [10.1038/  
278 s41467-021-21734-y](https://doi.org/10.1038/s41467-021-21734-y). URL: [http://dx.doi.org/10.1038/s41467-021-21734-  
279 y](http://dx.doi.org/10.1038/s41467-021-21734-y)<http://www.nature.com/articles/s41467-021-21734-y>.
- 280 [12] A. S.G. Smith and D. E. Rawlings. "Efficiency of the pTF-FC2 pas Poison-antidote sta-  
281 bility system in *Escherichia coli* is affected by the host strain, and antidote degradation  
282 requires the Lon protease". In: *Journal of Bacteriology* 180.20 (1998), pp. 5458–5462.  
283 ISSN: 00219193. DOI: [10.1128/jb.180.20.5458-5462.1998](https://doi.org/10.1128/jb.180.20.5458-5462.1998).
- 284 [13] Lyndsay Radnedge et al. "Plasmid maintenance functions of the large virulence plasmid  
285 of *Shigella flexneri*." In: *Journal of bacteriology* 179.11 (June 1997), pp. 3670–3675. ISSN:  
286 0021-9193. DOI: [10.1128/JB.179.11.3670-3675.1997](https://doi.org/10.1128/JB.179.11.3670-3675.1997). URL: [http://www.ncbi.nlm.  
287 nih.gov/pubmed/9171415](http://www.ncbi.nlm.nih.gov/pubmed/9171415)[http://www.pubmedcentral.nih.gov/articlerender.  
288 fcgi?artid=PMC179163](http://www.pubmedcentral.nih.gov/articlerender.fcgi?artid=PMC179163)<https://jb.asm.org/content/179/11/3670>.
- 289 [14] Shelly M. Deane and Douglas E. Rawlings. "Plasmid Evolution and Interaction between  
290 the Plasmid Addiction Stability Systems of Two Related Broad-Host-Range IncQ-Like  
291 Plasmids". In: *Journal of Bacteriology* 186.7 (2004), pp. 2123–2133. ISSN: 00219193.  
292 DOI: [10.1128/JB.186.7.2123-2133.2004](https://doi.org/10.1128/JB.186.7.2123-2133.2004).
- 293 [15] Elise R. Morton et al. "Non-additive costs and interactions alter the competitive dynamics  
294 of co-occurring ecologically distinct plasmids". In: *Proceedings of the Royal Society B:  
295 Biological Sciences* 281.1779 (2014). ISSN: 14712954. DOI: [10.1098/rspb.2013.2173](https://doi.org/10.1098/rspb.2013.2173).
- 296 [16] María Getino and Fernando de la Cruz. "Natural and Artificial Strategies To Control  
297 the Conjugative Transmission of Plasmids". In: *Microbiology Spectrum* 6.1 (2018). URL:  
298 [https://www.asmscience.org/content/journal/microbiolspec/10.1128/microbiolspec.  
299 MTBP-0015-2016](https://www.asmscience.org/content/journal/microbiolspec/10.1128/microbiolspec.MTBP-0015-2016).
- 300 [17] Diane E. Taylor, Jessie G. Levine, and David E. Bradley. "In vivo formation of a plasmid  
301 cointegrate expressing two incompatibility phenotypes". In: *Plasmid* 5.3 (1981), pp. 233–  
302 244. ISSN: 0147-619X. DOI: [https://doi.org/10.1016/0147-619X\(81\)90001-9](https://doi.org/10.1016/0147-619X(81)90001-9). URL:  
303 <https://www.sciencedirect.com/science/article/pii/0147619X81900019>.
- 304 [18] João Alves Gama, Rita Zilhão, and Francisco Dionisio. "Co-resident plasmids travel to-  
305 gether". In: *Plasmid* 93 (2017), pp. 24–29. ISSN: 0147-619X. DOI: <https://doi.org/10.1016/j.plasmid.2017.04.001>.

306 [10.1016/j.plasmid.2017.08.004](https://doi.org/10.1016/j.plasmid.2017.08.004). URL: [https://www.sciencedirect.com/science/](https://www.sciencedirect.com/science/article/pii/S0147619X17300537)  
307 [article/pii/S0147619X17300537](https://www.sciencedirect.com/science/article/pii/S0147619X17300537).
